1

2

**Molecular biogeography and host relations of a parasitoid fly**

3

4 David A. Gray<sup>1†</sup>, Henry D. Kunerth<sup>2,3†</sup>, Marlene Zuk<sup>3</sup>, William H. Cade<sup>4</sup>, and Susan L.

5

Balenger<sup>5†</sup>

6

7 <sup>1</sup>Department of Biology, California State University Northridge, Northridge, CA, 91330,

8

USA

9

<sup>2</sup>Department of Ecology and Evolutionary Biology, Cornell University, Ithaca, NY,

10

14853, USA

11

<sup>3</sup>Department of Ecology, Evolution, and Behavior, University of Minnesota, St. Paul, MN,

12

55108, USA

13

<sup>4</sup>Department of Biological Sciences, University of Lethbridge, Lethbridge, AB, T1K 3M4,

14

Canada

15

<sup>5</sup>Department of Biology, University of Mississippi, University, MS, 38677, USA

16

17

<sup>†</sup>These authors contributed equally to this work.

18

19

Correspondence: David Gray, Department of Biology, California State University

20

Northridge, 18111 Nordhoff Street, Northridge, CA 91330-8303; [dave.gray@csun.edu](mailto:dave.gray@csun.edu)

21

22

23 **Abstract.** Successful geographic range expansion by parasites and parasitoids may also  
24 require host range expansion. Thus the evolutionary advantages of host specialization  
25 may trade off against the ability to exploit new host species encountered in new  
26 geographic regions. Here we use molecular techniques and confirmed host records to  
27 examine biogeography, population divergence, and host flexibility of the parasitoid fly,  
28 *Ormia ochracea* (Bigot). Gravid females of this fly find their cricket hosts acoustically  
29 by eavesdropping on male cricket calling songs; these songs vary greatly among the  
30 known host species of crickets. Using both nuclear and mitochondrial genetic markers,  
31 we (1) describe the geographical distribution and sub-division of genetic variation in *O.*  
32 *ochracea* from across the continental United States, the Mexican states of Sonora and  
33 Oaxaca, and populations introduced to Hawaii; (2) demonstrate that the distribution of  
34 genetic variation among fly populations is consistent with a single widespread species  
35 with regional host specialization, rather than locally differentiated cryptic species, (3)  
36 identify the more-probable source populations for the flies introduced to the Hawaiian  
37 islands; (4) examine genetic variation and sub-structure within Hawaii; and (5) discuss  
38 specialization and lability in host-finding behavior in light of the diversity of cricket  
39 songs serving as host cues in different geographically separate populations.

40

41

42 Key Words: parasitoid, host-specialization, range expansion, *Gryllus*, *Teleogryllus*,

43 *Ormia*

44

45

46 **Introduction.**

47

48 Evolutionary specialization is often viewed as a double-edged sword: specialization may  
49 facilitate efficient exploitation of favored resources, but may also inhibit exploitation of  
50 novel resources. Specialization has often been viewed as an evolutionary ‘dead-end’  
51 (Raia and Fortelius, 2013, Jaenike, 1990, Kelley and Farrell, 1998), although recent  
52 research has revealed considerable flexibility among specialist lineages and occasional  
53 ‘reversals’ from specialized to more generalized niches (Vamosi et al., 2014, Gompert et  
54 al., 2015). The retention of evolutionary lability may be especially relevant for  
55 geographic range expansion; indeed ‘generalist’ species are often among the most  
56 invasive (Romanuk et al., 2009) – a pattern found among plants, arthropods, mammals  
57 and birds (Higgins and Richardson, 2014, González-Suárez et al., 2015, Blackburn and  
58 Duncan, 2001, Snyder and Evans, 2006). For specialist species to expand their  
59 geographic range, they must readily encounter suitable resources, exhibit phenotypic  
60 plasticity enabling adoption of novel resources, and/or show rapid evolutionary  
61 adaptation.

62 Parasitoid insects, especially Ichneumonid and Braconid wasps (Hymenoptera)  
63 and Tachinid flies (Diptera), are especially illuminating for studies of host specialization,  
64 ranging from extreme generalists to extreme specialists (Quicke, 2014, Stireman et al.,  
65 2006). Some species are sufficiently host specific to be used for classical biological  
66 control of pests (Parkman et al., 1996, Vargas et al., 2007), others routinely utilize a  
67 broad range of hosts (Stireman, 2005, Tschorsnig, 2017, Arnaud, 1978), and in other

68 cases, presumed generalists are later revealed to be complexes of cryptic specialists  
69 (Smith et al., 2008).

70           Within the ca. 9000 species of Tachinids, the Ormiini tribe represents a small  
71 group (ca. 68 described species) of highly specialized flies (Sabrosky, 1953a, Sabrosky,  
72 1953b, Lehmann, 2003). Several specializations are noteworthy for the entire group (so  
73 far as is known): all are parasitoids of crickets or katydids (Ensifera, Orthoptera); all  
74 locate their (principally male) hosts using a specialized ear (Edgecomb et al., 1995,  
75 Hedwig and Robert, 2014) to eavesdrop on their male host's mating song (Lehmann,  
76 2003, Cade, 1975, Allen, 1995); all have sclerotized planidiform larvae which are  
77 somewhat mobile and actively burrow into the host (Cantrell, 1988, Adamo et al.,  
78 1995b). Within this group, all genera with known hosts parasitize katydids  
79 (Tettigoniidae); in the genus *Ormia* most species parasitize katydids but three species  
80 attack crickets and mole crickets (Gryllidae and Gryllotalpidae) (Lehmann, 2003). The  
81 shift from katydids to crickets and mole crickets represents a significant shift in female  
82 fly hearing towards lower frequency sounds (ca. 4-5 kHz in crickets and ca. 2-3 kHz in  
83 mole crickets) than are typical of most katydids (often >>10kHz). Utilization of katydids  
84 with relatively low frequency calls may have facilitated the evolutionary transition to  
85 crickets and mole crickets. For example, certain katydid hosts of Ormiines have relatively  
86 low frequency calls, e.g. ca. 5-6 kHz in *Sciarasaga quadrata* (host of *Homotrixa alleni*)  
87 (Allen et al., 1999); ca. 7 kHz in *Neoconocephalus robustus* (host of *O. brevicornis*)  
88 (Nutting, 1953); ca. 8 kHz in *Orchelimum pulchellum* (one of several hosts of *O.*  
89 *lineifrons*) (Shapiro, 1995).

90           Within *Ormia*, *O. ochracea* has been most extensively studied. Peak sensitivity of  
91 female hearing closely matches or is at slightly higher frequencies than typical male  
92 calling song (Robert et al., 1992). The current geographic range attributed to this species  
93 extends from Florida (Walker and Wineriter, 1991), across the southern Gulf States  
94 (Henne and Johnson, 2001), into Texas (Cade, 1975), Arizona (Sakaguchi and Gray,  
95 2011), California (Wagner, 1996), and Mexico (Sabrosky, 1953b); throughout this range  
96 it parasitizes various species of *Gryllus* field crickets (see below). In addition, *O.*  
97 *ochracea* was introduced to Hawaii by at least 1989 (Evenhuis, 2003), where it  
98 parasitizes *Teleogryllus oceanicus*, itself introduced to Hawaii by at least 1877 (Kevan,  
99 1990) and possibly earlier, perhaps facilitated by Polynesian settlement (Tinghitella et al.,  
100 2011). Localized populations of *O. ochracea* show varying degrees of host  
101 specialization: flies in Florida almost exclusively parasitize *Gryllus rubens* (Walker,  
102 1993, Walker and Wineriter, 1991); flies in Texas primarily parasitize *G. texensis* (Cade,  
103 1975); flies in Arizona regularly parasitize multiple *Gryllus* species (Sakaguchi and Gray,  
104 2011); flies in southern California primarily parasitize *G. lineaticeps* (Wagner, 1996,  
105 Wagner and Basolo, 2007); as noted above, Hawaiian flies parasitize *T. oceanicus*.  
106 Remarkably, playback experiments in Florida, Texas, California, and Hawaii, which  
107 simultaneously presented the songs of *G. rubens*, *G. texensis*, *G. lineaticeps*, and *T.*  
108 *oceanicus*, revealed that each fly population showed a significant (but not exclusive)  
109 preference for the song of its primary local host species of cricket (Gray et al., 2007).  
110 This suggests an even further degree of host specialization in these flies – possibly  
111 indicative of cryptic host races or species as has been found in other Tachinids (Smith et

112 al., 2008, Smith et al., 2006). Determining the extent to which geographic and host range  
113 subdivision is coupled with genetic subdivision is thus one of the goals of this study.

114 Successful establishment of *O. ochracea* in Hawaii represents a significant  
115 expansion of both the geographic and host range of the fly. How can such a specialist  
116 invade, switch to a novel host with a strongly divergent song structure, and in the course  
117 of a few decades come to prefer that novel host's song to the songs of ancestral hosts?  
118 Two of our aims in this paper are to use mitochondrial and nuclear markers both to  
119 examine genetic variation within Hawaii and to identify the more-likely continental  
120 source population(s) of those Hawaiian flies, and thereby the most likely types of recent  
121 ancestral host songs. This necessitates broad sampling of continental populations, and we  
122 therefore expand upon the previous work in the USA and include flies from populations  
123 in both northern and southern Mexico, as well as catalog the confirmed host species and  
124 their songs in each of these areas. We apply standard phylogeographic analyses to  
125 mitochondrial DNA sequence data, including outgroup species of *Ormia*, and we adopt a  
126 population genetic approach to analysis of microsatellite nuclear markers.

127

## 128 **Methods.**

### 129 *Fly collection*

130 We collected flies at mesh screen and/or bottle traps using playbacks of cricket songs  
131 (Walker, 1989); we also collected a small number of flies at lights or as they emerged  
132 from field-collected crickets. Table 1 provides details of locations and dates of sampling.  
133 Collected flies were preserved in ethanol until DNA extraction and further analysis. We  
134 extracted DNA using a Qiagen DNeasy tissue kit according to the manufacturer's

135 instructions. We used entire flies as source tissue for all of the mainland and 13 of the  
136 Hawaiian flies, and head and thorax tissue for the remainder of the Hawaiian flies. In  
137 theory, the whole tissue extractions could include DNA from larvae, although the  
138 amounts of such DNA would be trivial compared to maternal DNA. We quantified DNA  
139 using a Nanodrop system and adjusted concentrations to between 20 and 75 ng/ul.

140

#### 141 *Genetic Markers & Analysis*

142 We analyzed population structure using both mitochondrial and nuclear markers. For  
143 mtDNA, we analyzed a section of *Cytochrome C Oxidase subunit I* (hereafter COI) PCR  
144 amplified in two overlapping fragments with ‘universal’ primer pairs Jerry-Pat and Ron-  
145 Nancy (Simon et al., 1994), resulting in 1111 bp after alignment. In addition, we  
146 developed nuclear microsatellite markers *de novo* for this project. Marker discovery was  
147 performed by 454 sequencing at the Cornell University Life Sciences Core Laboratories  
148 Center with further validation done by SLB and HDK. We identified and tested 17 msat  
149 markers from this dataset consisting of 3, 4, and 6 bp repeats. PCR conditions followed a  
150 ‘touchdown’ protocol of 95° for 40 seconds, 66° for 45 seconds, and 72° for 45 seconds.  
151 The annealing step was reduced by one degree every cycle for the first seven cycles.  
152 Cycles 8-35 followed a pattern of 95° for 40s, 58° for 45s, and 72° for 45s. PCR  
153 products were stored at -20°C until genotyped. Individuals were genotyped at  
154 microsatellite loci by the University of Minnesota Genomics Center on an Applied  
155 Biosystems 3730xl DNA Analyzer. We scored alleles for fragment size manually using  
156 Peak Scanner 2.0 software. Multiple independent analysts scored the same products to

157 assure veracity of the calls. If no clear designation could be made or alleles did not  
158 amplify, we scored the data as missing.

159

160 *Bioinformatic Analyses*

161 Prior to analysis of microsatellite fragments, we filtered individuals and loci for missing  
162 data. A strict cutoff of >25% missing data led to the exclusion of 6 loci. Following this  
163 filter, we excluded any individuals with missing data at 3 or more loci. The final dataset  
164 included 274 individuals genotyped at 11 loci with between 6 and 17 alleles per locus  
165 (Table 2). To estimate the number of alleles and private alleles accurately given unequal  
166 sample sizes per population, we performed a rarefaction analysis using HP-Rare  
167 (Kalinowski, 2005). We visualized population genetic variation using a discriminant  
168 function analysis of principal components (DAPC) with 80 principal components and 4  
169 discriminant functions using the adegenet (Jombart, 2008, Jombart and Ahmed, 2011)  
170 and pegas (Paradis, 2010) packages in R.

171 To visualize genetic structure, we implemented the Bayesian analysis program  
172 STRUCTURE v2.3.4 using an admixture model with correlated allele frequencies. We  
173 used a burn-in of 50,000 steps and 100,000 MCMC iterations. We conducted separate  
174 runs for the full dataset, a dataset with the Hawaiian samples excluded, and a dataset of  
175 only Hawaiian samples. For the full dataset, we performed 5 runs each for  $k = 2-9$ . To  
176 infer the likely number of genetic clusters, we used both the  $L_n$  estimated probability of  
177 the data from STRUCTURE and the Evanno method utilizing  $\Delta k$  (Evanno et al., 2005).



178 We calculated pairwise estimates of  $F_{st}$  (Weir and Cockerham, 1984) and Nei's  
179 genetic distance between populations using the R packages *adegenet* and *ade4* (Chessel  
180 et al., 2004), and we calculated expected and observed heterozygosity using *adegenet*.

181 We built a mitochondrial haplotype network using 55 haplotypes from 1111 bp of  
182 COI sequences from 275 individuals using the R package *pegas* (Paradis, 2010) with  
183 default parameters.

184

185

### 186 *Host Ranges & Songs*

187 To provide context for understanding the degree of host specialization, we present in this  
188 paper the songs of confirmed hosts in each of the geographic regions studied. We present  
189 only hosts confirmed to be naturally parasitized by development of *O. ochracea* from  
190 field-collected crickets. We suspect that a few additional host species will be confirmed  
191 in the USA, especially if the species is only occasionally parasitized, and we expect that  
192 many more species are parasitized in southern and central Mexico; this reflects the status  
193 of current knowledge of *Gryllus* systematics and the extent of field sampling. Many of  
194 the confirmed host species are not yet officially described (DB Weissman and DA Gray,  
195 in prep.); to provide continuity within the literature we use provisional manuscript names  
196 here and note that the names are disclaimed as unavailable per Article 8.3 of the ICZN.

197 In an attempt to quantify relative song differences, we created a Euclidean song  
198 distance matrix using `matrix <- dist(songdata)` function in R. Song variables were:  
199 dominant frequency (kHz), pulse rate, pulses per chirp or trill (ln transformed), pulse duty  
200 cycle, song type (chirp, trill, stutter-trill, complex stutter-trill), chirps per trill (for stutter-

201 trillers), as well as introductory pulses per trill and introductory pulse rate (for complex  
202 stutter-trillers). Prior to matrix calculation, the raw song data were normalized as z-  
203 scores. The resulting song distance matrix has the advantage of objectively showing unit-  
204 less quantitative differences among species, but has the disadvantage that the different  
205 song features are not weighted by their perceptual importance to *O. ochracea*, which  
206 would be preferable but is not currently possible.

207

## 208 **Results.**

### 209 *Nuclear and mitochondrial genetics*

210 Following filtration at missing data cutoffs, 274 individuals and 11 loci were included in  
211 the final msat dataset, with 1.86% data missing. Heterozygosity across all individuals was  
212 50.9%. The Hawaiian populations showed a drastic decrease in heterozygosity (Table 3).  
213 The rarefaction analysis also suggested a substantial decrease in both total and private  
214 allelic diversity within the Hawaiian populations (Table 2).

215 Analysis of Nei's genetic distances documented a clear split between Hawaiian  
216 and mainland populations (Table 4), with Hawaiian populations more similar to western  
217 mainland populations. Longitude explained the primary axis of variation among the  
218 mainland populations, with a clear east-west gradient evident in both the DAPC and  
219 mtDNA haplotype network (Fig. 1), as well as in the pairwise  $F_{st}$  and Nei's distances  
220 (Table 4).

221 For the full dataset, STRUCTURE analyses indicated the strongest support for  
222  $k=2$  genetic clusters (Fig. 2) separating Hawaiian from mainland populations, however  
223 support for  $k=3$  clusters was also high, which further divided the mainland populations

224 into eastern and western subsets (Fig. 2). STRUCTURE plots for within Hawaii (k=2  
225 and k=3) and mainland (k=2, k=3, and k=6) are in Supplemental Materials Figs. S1 and  
226 S2.

227 The mtDNA haplotype network (Fig. 1b) also showed (1) low genetic variation  
228 within Hawaii, (2) affinity of the Hawaiian sequences for the western mainland (i.e.  
229 California) sequences, and (3) a longitudinal geographic structure within the mainland  
230 populations. Oaxaca had a high diversity of haplotypes shared with all other mainland  
231 populations.

232 Given the apparent distinctness of the Hawaiian populations, it is important to  
233 emphasize that these patterns reflect founder effects, and concomitant change in allele  
234 frequency in Hawaii, not the development of novel genetic variation in Hawaii. This is  
235 most easily seen in allele frequency histograms which show that the Hawaiian genetic  
236 variation is effectively a simple subset of the genetic variation found in western mainland  
237 populations, themselves a simple subset of the genetic variation found in Florida, Texas,  
238 and Mexico populations (see Fig. 3 for a representative locus; figures for all other loci  
239 show similar patterns and are presented as Supplemental Materials Figures S3-S12).

240

#### 241 *Host range and song structures*

242 Confirmed host species, geographic range information, as well as host calling song type,  
243 frequency, pulse rate, and pulses/chirp are presented in Table 5. Songs of confirmed host  
244 species vary dramatically, from simple chirps to complex trills; see waveform  
245 oscillograms and frequency spectrograms in Figures 4 and 5, respectively.

246 The song distance matrix shows nearly 30-fold variation among species in  
247 pairwise inter-host song distance comparisons (Fig. 6). Notably, the average distance of  
248 *T. oceanicus* song from each of the other songs was about double the average distances  
249 for the continental *Gryllus* species (7.75 versus 3.85,  $Z = 7.4$ ,  $p < 0.0001$ ).

250

## 251 **Discussion.**

252 Our results suggest the following: (1) *O. ochracea* is a single widespread species with  
253 regional host specialization, not a complex of cryptic species, (2) *O. ochracea* has spread  
254 geographically into northern Mexico (Sonora) and the western USA (Arizona and  
255 California) from source populations in southern Mexico (Oaxaca) and/or the southern  
256 USA Gulf region (Florida, Texas), (3) Hawaiian flies were introduced from a western  
257 continental USA population, most likely California, potentially consisting of as few as  
258 one gravid female fly, and (4) novel song types with highly divergent song structures do  
259 not inhibit novel host exploitation. We elaborate on these results below, and discuss  
260 mechanisms of regional host song specialization.

261 Studies of other Tachinid groups have sometimes revealed that what was  
262 considered a single generalist species actually consists of a complex of cryptic specialist  
263 species (Smith et al., 2007, Smith et al., 2006). The regional host specialization in *O.*  
264 *ochracea* documented previously (Gray et al., 2007) could have been consistent with  
265 either a widespread generalist with regional host preferences or with multiple cryptic host  
266 specialists. Both the mtDNA and msat variation suggest a single species. The mtDNA  
267 sequences, although showing clear east-west geographic structure, are relatively uniform  
268 and strongly divergent from *O. depleta* and *O. lineifrons* sequences (Supplemental

269 Materials Figure S13). The msat data clearly show that populations strongly  
270 differentiated in host song preferences can nonetheless be genetically panmictic. Perhaps  
271 the best example of this involves flies from Florida and Texas: Gray et al. (2007) showed  
272 that Florida flies preferred *G. rubens* song over *G. texensis* song nearly 2:1 and that  
273 Texas flies preferred *G. texensis* song over *G. rubens* song 6:1. Nonetheless the pairwise  
274 Fst of 0.008 for these populations (Table 3) and the DAPC (Fig. 1a) show that these two  
275 populations are genetically rather homogenous.

276 Both the mtDNA and msat data also inform the broader geographic history of the  
277 fly within North America. There is a clear east-west differentiation among samples,  
278 potentially consistent with isolation by distance. Moreover, the pattern of allelic variation  
279 in the msat loci (e.g. Fig. 3) suggests serial founder effects as flies colonized the western  
280 continental USA and then Hawaii. The mtDNA similarly suggests that the older fly  
281 lineages are to be found within the southeastern USA populations (Fig. 1b; Fig. S13). In  
282 this light, it is interesting to note that Florida is home to two *Gryllus* species, *G. ovisopis*  
283 and *G. cayensis*, which lack a normal calling song (Gray et al., 2018, Walker, 1974,  
284 Walker, 2001), possibly a consequence of a prolonged history of *Ormia* parasitism in that  
285 region. In contrast, there are no non-calling *Gryllus* in western North America.

286 The introduction of *O. ochracea* to Hawaii appears virtually certain to have been  
287 from a western North American population. The dominant mtDNA haplotype in Hawaii  
288 is also found in California and Arizona (Fig. 1b); the msat allelic variation in Hawaii is  
289 likewise a subset of the most common alleles in California and Arizona (Fig. 3). A single  
290 introduction seems likely; the levels of genetic variation in Hawaii do not preclude the  
291 possibility that the introduction could have consisted of as few as one gravid female,

292 although it seems more plausible that multiple individuals were introduced, perhaps as  
293 pupae in soil. In other systems, experimental introductions have indicated that in some  
294 circumstances introductions of a single gravid female can nonetheless establish a  
295 persistent population (Grevstad, 1999, Fauvergue et al., 2007). Within Hawaii, our data  
296 are consistent with the spread of an introduced population among islands, rather than  
297 separate introductions on each island (Supplemental Fig. S1).

298         Once in Hawaii, the adoption of *T. oceanicus* as a host represents a major shift  
299 within *O. ochracea*'s repertoire of host song recognition. Quantitatively and  
300 qualitatively, *T. oceanicus* song is strikingly divergent from the songs of continental  
301 North American hosts (Figs. 4-6). Across the diversity of host songs, one could argue  
302 that the single essential song recognition feature is a dominant frequency in the 3-6 kHz  
303 range. This may be true in a strict sense, but frequency is clearly not the only song  
304 recognition feature. Multiple studies have shown that the temporal pattern of sound  
305 pulses is also important (Gray and Cade, 1999, Sakaguchi and Gray, 2011, Wagner,  
306 1996, Wagner and Basolo, 2007, Walker, 1993). Moreover, fly populations prefer the  
307 temporal structure of their most common host species, even when dominant frequencies  
308 are similar (Gray et al., 2007). Perhaps most remarkably, Hawaiian *O. ochracea* preferred  
309 *T. oceanicus* song over the songs of ancestral host species by a large margin (12 of 13  
310 Hawaiian flies chose *T. oceanicus* song over the songs of *G. rubens*, *G. texensis*, and *G.*  
311 *lineaticeps*).

312         Adoption of *T. oceanicus* as a host in Hawaii also required compatible host  
313 physiology for larval development. Although mostly confined to parasitism of adult  
314 males, *O. ochracea* can develop within a wide variety of crickets, including juveniles

315 (Vincent and Bertram, 2009) and species not normally used as hosts (Thomson et al.,  
316 2012, Adamo et al., 1995a) including *Acheta domesticus* (Paur and Gray, 2011b, Paur  
317 and Gray, 2011a, Wineriter and Walker, 1990) which is more distantly related to *Gryllus*  
318 than is *Teleogryllus* (Gray, D.A, Weissman, D.B., Lemmon, E.M., Lemmon, A.R,  
319 unpublished data). This latitude probably results from the generalized nature of the  
320 cricket immune encapsulation response (Vinson, 1990), which is exploited by Ormiines  
321 to develop a respiratory spiracle. Given this latitude, we expect that physiological  
322 compatibility with *T. oceanicus* was unlikely to be a significant factor in terms of host  
323 suitability.

324 Our results suggest that host specialization in *O. ochracea* is not at odds with  
325 rapid exploitation of novel hosts, as might be expected from evolutionary theory (Raia  
326 and Fortelius, 2013, Jaenike, 1990, Kelley and Farrell, 1998). But how can highly  
327 regional host song specificity (Gray et al., 2007), even to the point of flies having song  
328 preferences for certain intra-specific song variants (Gray and Cade, 1999, Sakaguchi and  
329 Gray, 2011, Wagner, 1996, Wagner and Basolo, 2007), be compatible with flexible and  
330 rapid adoption of novel hosts? If population differentiation does not explain regional  
331 host specialization, as suggested by the results presented here, then behavioral plasticity  
332 coupled with local host learning (Paur and Gray, 2011a) may be the mechanism that  
333 enables flies to escape the ‘dead-end’ of specialization.

334

335

336

337

338

339

340

341 Acknowledgements.

342 We are grateful for the advice and/or assistance of Steve Bogdanowicz; Thomas Chaffee;

343 Thomas J. Walker; David B. Weissman.

344

345 Author Contributions: DAG, SLB, MZ, and WHC conceived of the study and collected

346 flies; DAG performed the mtDNA sequencing; SLB and HDK performed the msat

347 amplification and analysis; all authors contributed to the writing and editing of the

348 manuscript.

349

350 Data Accessibility

351 The COI sequence data have been deposited in GenBank with accession numbers

352 MK522523-MK522797. Upon acceptance the msat data will be archived in Dryad.

353

354

355

## REFERENCES

356

357 Adamo, S. A., Robert, D. & Hoy, R. R. 1995a. Effects of a tachinid parasitoid, *Ormia*  
358 *ochracea*, on the behaviour and reproduction of its male and female field cricket  
359 hosts (*Gryllus* spp). *Journal of Insect Physiology*, 41, 269-277.

360 Adamo, S. A., Robert, D., Perez, J. & Hoy, R. R. 1995b. The response of an insect  
361 parasitoid, *Ormia ochracea* (Tachinidae), to the uncertainty of larval success  
362 during infestation. *Behavioral Ecology and Sociobiology*, 36, 111-118.

363 Allen, G. R. 1995. The biology of the phonotactic parasitoid, *Homotrixa* sp. (Diptera:  
364 Tachinidae), and its impact on the survival of male *Sciarasaga quadrata*  
365 (Orthoptera: Tettigoniidae) in the field. *Ecological Entomology*, 20, 103-110.



- 366 Allen, G. R., Kamien, D., Berry, O., Byrne, P. & Hunt, J. 1999. Larviposition, host cues,  
367 and planidial behavior in the sound-locating parasitoid fly *Homotrixa alleni*  
368 (Diptera: Tachinidae). *Journal of Insect Behavior*, 12, 67-79.
- 369 Arnaud, P. H. 1978. Host Parasite Catalog of North American Tachinidae (Diptera).  
370 *United States Department of Agriculture, Miscellaneous Publication*, 1319, 1-  
371 860.
- 372 Blackburn, T. M. & Duncan, R. P. 2001. Determinants of establishment success in  
373 introduced birds. *Nature*, 414, 195.
- 374 Blankers, T., Hennig, M. R. & Gray, D. A. 2015. Conservation of multivariate female  
375 preference functions and preference mechanisms in three species of trilling field  
376 crickets. *J. Evol. Biol.*, 28, 630-641.
- 377 Cade, W. H. 1975. Acoustically orienting parasitoids: fly phonotaxis to cricket song.  
378 *Science*, 190, 1312-1313.
- 379 Cade, W. H. 1981. Field cricket spacing and the phonotaxis of crickets and parasitoid  
380 flies to clumped and isolated cricket songs. *Zeitschrift für Tierpsychologie*, 55,  
381 365-375.
- 382 Cade, W. H., Ciceran, M. & Murray, A.-M. 1996. Temporal patterns of parasitoid fly  
383 (*Ormia ochracea*) attraction to field cricket song (*Gryllus integer*). *Canadian*  
384 *Journal of Zoology*, 74, 393-395.
- 385 Cantrell, B. 1988. The comparative morphology of the male and female postabdomen of  
386 the Australian Tachinidae (Diptera), with descriptions of some first-instar larvae  
387 and pupae. *Invertebrate Systematics*, 2, 81-221.
- 388 Chessel, D., Dufour, A. B. & Thioulouse, J. 2004. The ade4 package-I-One-table  
389 methods. *R news*, 4, 5-10.
- 390 Doherty, J. A. & Storz, M. M. 1992. Calling song and selective phonotaxis in the field  
391 crickets, *Gryllus firmus* and *G. pennsylvanicus* (Orthoptera: Gryllidae). *Journal of*  
392 *Insect Behavior*, 5, 555-569.
- 393 Edgecomb, R. S., Robert, D., Read, M. P. & Hoy, R. R. 1995. The tympanal hearing  
394 organ of a fly: phylogenetic analysis of its morphological origins. *Cell and tissue*  
395 *research*, 282, 251-268.
- 396 Evanno, G., Regnaut, S. & Goudet, J. 2005. Detecting the number of clusters of  
397 individuals using the software STRUCTURE: a simulation study. *Molecular*  
398 *Ecology*, 14, 2611-2620.
- 399 Evenhuis, N. L. 2003. The status of the cricket parasites *Ormia ochracea* and  
400 *Phasioormia pallida* in the Hawaiian Islands (Diptera: Tachinidae). *Bishop*  
401 *Museum Occasional Papers*, 74, 34-35.
- 402 Fauvergue, X., Malausa, J.-C., Giuge, L. & Courchamp, F. 2007. Invading parasitoids  
403 suffer no Allee effect: a manipulative field experiment. *Ecology*, 88, 2392-2403.
- 404 Gompert, Z., Jahner, J. P., Scholl, C. F., Wilson, J. S., Lucas, L. K., Soria-Carrasco, V.,  
405 Fordyce, J. A., Nice, C. C., Buerkle, C. A. & Forister, M. L. 2015. The evolution  
406 of novel host use is unlikely to be constrained by trade-offs or a lack of genetic  
407 variation. *Molecular ecology*, 24, 2777-2793.
- 408 González-Suárez, M., Bacher, S. & Jeschke, J. M. 2015. Intraspecific trait variation is  
409 correlated with establishment success of alien mammals. *The American*  
410 *Naturalist*, 185, 737-746.

- 411 Gray, D. A., Banuelos, C. M., Walker, S. E., Cade, W. H. & Zuk, M. 2007. Behavioural  
412 specialisation among populations of the acoustically-orienting parasitoid fly  
413 *Ormia ochracea* utilising different cricket species as hosts. *Animal Behaviour*, 73,  
414 99-104.
- 415 Gray, D. A. & Cade, W. H. 1999. Sex, death and genetic variation: natural and sexual  
416 selection on cricket song. *Proceedings of the Royal Society of London, Series B:*  
417 *Biological Sciences*, 266, 707-709.
- 418 Gray, D. A., Gabel, E., Blankers, T. & Hennig, R. M. 2016a. Multivariate female  
419 preference tests reveal latent perceptual biases. *Proc. R. Soc. B*, 283, DOI:  
420 10.1098/rspb.2016.1972.
- 421 Gray, D. A., Gutierrez, N. J., Chen, T. L., Gonzalez, C., Weissman, D. B. & Cole, J. A.  
422 2016b. Species divergence in field crickets: genetics, song, ecomorphology, and  
423 pre- and postzygotic isolation. *Biological Journal of the Linnaean Society*, 117,  
424 192-205.
- 425 Gray, D. A., Hormozi, S., Libby, F. R. & Cohen, R. W. 2018. Induced expression of a  
426 vestigial sexual signal. *Biology Letters*, 14, 20180095.
- 427 Grevstad, F. S. 1999. Experimental invasions using biological control introductions: the  
428 influence of release size on the chance of population establishment. *Biological*  
429 *Invasions*, 1, 313-323.
- 430 Hedrick, A. V. & Kortet, R. 2006. Hiding behaviour in two cricket populations that differ  
431 in predation pressure. *Animal Behaviour*, 72, 1111-1118.
- 432 Hedrick, A. V. & Weber, T. 1998. Variance in female responses to the fine structure of  
433 male song in the field cricket, *Gryllus integer*. *Behavioral Ecology*, 9, 582-591.
- 434 Hedwig, B. & Robert, D. 2014. Auditory parasitoid flies exploiting acoustic  
435 communication of insects. *Insect hearing and acoustic communication*. Springer.
- 436 Henne, D. C. & Johnson, S. J. 2001. Seasonal distribution and parasitism of *Scapteriscus*  
437 spp. (Orthoptera: Gryllotalpidae) in southeastern Louisiana. *Florida*  
438 *Entomologist*, 84, 209-214.
- 439 Higgins, S. I. & Richardson, D. M. 2014. Invasive plants have broader physiological  
440 niches. *Proceedings of the National Academy of Sciences*, 111, 10610-10614.
- 441 Izzo, A. S. & Gray, D. A. 2004. Cricket song in sympatry: species specificity of song  
442 without reproductive character displacement in *Gryllus rubens*. *Annals of the*  
443 *Entomological Society of America*, 97, 831-837.
- 444 Jaenike, J. 1990. Host specialization in phytophagous insects. *Annual Review of Ecology*  
445 *and Systematics*, 21, 243-273.
- 446 Jombart, T. 2008. adegenet: a R package for the multivariate analysis of genetic markers.  
447 *Bioinformatics*, 24, 1403-1405.
- 448 Jombart, T. & Ahmed, I. 2011. adegenet 1.3-1: new tools for the analysis of genome-  
449 wide SNP data. *Bioinformatics*, 27, 3070-3071.
- 450 Kalinowski, S. T. 2005. hp-rare 1.0: a computer program for performing rarefaction on  
451 measures of allelic richness. *Molecular Ecology Notes*, 5, 187-189.
- 452 Kelley, S. T. & Farrell, B. D. 1998. Is specialization a dead end? The phylogeny of host  
453 use in *Dendroctonus* bark beetles (Scolytidae). *Evolution*, 52, 1731-1743.
- 454 Kevan, D. K. M. 1990. Introduced grasshoppers and crickets in Micronesia. *Boletin de*  
455 *Sanidad Vegetal*, 20, 105-123.

- 456 Lehmann, G. U. C. 2003. Review of biogeography, host range and evolution of acoustic  
457 hunting in Ormiini (Insecta, Diptera, Tachinidae), parasitoids of night-calling  
458 bushcrickets and crickets (Insecta, Orthoptera, Ensifera). *Zoologischer Anzeiger*,  
459 242, 107-120.
- 460 Nutting, W. L. 1953. The biology of *Euphasiopteryx brevicornis* (Townsend) (Diptera,  
461 Tachinidae), a parasite in the cone-headed grasshoppers (Orthoptera:  
462 Copiphorinae). *Psyche*, 60, 69-81.
- 463 Paradis, E. 2010. pegas: an R package for population genetics with an integrated-  
464 modular approach. *Bioinformatics*, 26, 419-420.
- 465 Parkman, J. P., Frank, J. H., Walker, T. J. & Schuster, D. J. 1996. Classical biological  
466 control of *Scapteriscus* spp. (Orthoptera: Gryllotalpidae) in Florida.  
467 *Environmental Entomology*, 25, 1415-1420.
- 468 Paur, J. & Gray, D. A. 2011a. Individual consistency, learning and memory in a  
469 parasitoid fly, *Ormia ochracea*. *Animal Behaviour*, 82, 825-830.
- 470 Paur, J. & Gray, D. A. 2011b. Seasonal dynamics and overwintering strategy of the  
471 tachinid fly, *Ormia ochracea*, in southern California. *Terrestrial Arthropod*  
472 *Reviews*, 4, 145-156.
- 473 Quicke, D. L. 2014. *The braconid and ichneumonid parasitoid wasps: biology,*  
474 *systematics, evolution and ecology*, John Wiley & Sons.
- 475 Raia, P. & Fortelius, M. 2013. Cope's Law of the Unspecialized, Cope's Rule, and weak  
476 directionality in evolution. *Evolutionary Ecology Research*, 15, 747-756.
- 477 Robert, D., Amoroso, J. & Hoy, R. R. 1992. The evolutionary convergency of hearing in  
478 a parasitoid fly and its cricket host. *Science, Wash.*, 258, 1135-1137.
- 479 Romanuk, T. N., Zhou, Y., Brose, U., Berlow, E. L., Williams, R. J. & Martinez, N. D.  
480 2009. Predicting invasion success in complex ecological networks. *Philosophical*  
481 *Transactions of the Royal Society B: Biological Sciences*, 364, 1743-1754.
- 482 Sabrosky, C. W. 1953a. Taxonomy and host relations of the tribe Ormiini in the western  
483 hemisphere (Diptera, Larvaevoridae). *Proceedings of the Entomological Society*  
484 *of Washington*, 55, 167-183.
- 485 Sabrosky, C. W. 1953b. Taxonomy and host relations of the tribe Ormiini in the western  
486 hemisphere, II (Diptera, Larvaevoridae). *Proceedings of the Entomological*  
487 *Society of Washington*, 55, 289-305.
- 488 Sakaguchi, K. M. & Gray, D. A. 2011. Host song selection by an acoustically-orienting  
489 parasitoid fly exploiting a multi-species assemblage of cricket hosts. *Animal*  
490 *Behaviour*, 81, 851-858.
- 491 Shapiro, L. 1995. Parasitism of *Orchelimum* katydids (Orthoptera: Tettigoniidae) by  
492 *Ormia lineifrons* (Diptera: Tachinidae). *Florida Entomologist*, 78, 615-616.
- 493 Simon, C., Frati, F., Beckenbach, A., Crespi, B., Liu, H. & Flook, P. 1994. Evolution,  
494 weighting, and phylogenetic utility of mitochondrial gene sequences and a  
495 compilation of conserved polymerase chain reaction primers. *Annals of the*  
496 *Entomological Society of America*, 87, 651-701.
- 497 Smith, M. A., Rodriguez, J. J., Whitfield, J. B., Deans, A. R., Janzen, D. H., Hallwachs,  
498 W. & Hebert, P. D. 2008. Extreme diversity of tropical parasitoid wasps exposed  
499 by iterative integration of natural history, DNA barcoding, morphology, and  
500 collections. *Proceedings of the National Academy of Sciences*, 105, 12359-12364.

- 501 Smith, M. A., Wood, D. M., Janzen, D. H., Hallwachs, W. & Hebert, P. D. 2007. DNA  
502 barcodes affirm that 16 species of apparently generalist tropical parasitoid flies  
503 (Diptera, Tachinidae) are not all generalists. *Proceedings of the National*  
504 *Academy of Sciences, U S A*, 104, 4967-72.
- 505 Smith, M. A., Woodley, N. E., Janzen, D. H., Hallwachs, W. & Hebert, P. D. 2006. DNA  
506 barcodes reveal cryptic host-specificity within the presumed polyphagous  
507 members of a genus of parasitoid flies (Diptera: Tachinidae). *Proceedings of the*  
508 *National Academy of Sciences, U S A*, 103, 3657-62.
- 509 Snyder, W. E. & Evans, E. W. 2006. Ecological effects of invasive arthropod generalist  
510 predators. *Annu. Rev. Ecol. Evol. Syst.*, 37, 95-122.
- 511 Stireman, J. 2005. The evolution of generalization? Parasitoid flies and the perils of  
512 inferring host range evolution from phylogenies. *Journal of evolutionary biology*,  
513 18, 325-336.
- 514 Stireman, J. O., O'Hara, J. E. & Wood, D. M. 2006. Tachinidae: Evolution, behavior, and  
515 ecology. *Annual Review of Entomology*, 51, 525-555.
- 516 Thomson, I. R., Vincent, C. M. & Bertram, S. 2012. Success of the parasitoid fly *Ormia*  
517 *ochracea* (Diptera: Tachinidae) on natural and unnatural cricket hosts. *Florida*  
518 *Entomologist*, 95, 43-48.
- 519 Tinghitella, R., Zuk, M., Beveridge, M. & Simmons, L. 2011. Island hopping introduces  
520 Polynesian field crickets to novel environments, genetic bottlenecks and rapid  
521 evolution. *Journal of evolutionary biology*, 24, 1199-1211.
- 522 Tschorsnig, H.-P. 2017. *Preliminary host catalog of Palearctic Tachinidae (Diptera)*  
523 [Online]. Available:  
524 [http://www.nadsdiptera.org/Tach/WorldTachs/CatPalHosts/Cat\\_Pal\\_tach\\_hosts](http://www.nadsdiptera.org/Tach/WorldTachs/CatPalHosts/Cat_Pal_tach_hosts_Ver1.pdf)  
525 [Ver1.pdf](http://www.nadsdiptera.org/Tach/WorldTachs/CatPalHosts/Cat_Pal_tach_hosts_Ver1.pdf) [Accessed June 28, 2018].
- 526 Vamosi, J. C., Armbruster, W. S. & Renner, S. S. 2014. Evolutionary ecology of  
527 specialization: insights from phylogenetic analysis. 281, 2014.2004.
- 528 Vargas, R. I., Leblanc, L., Putoa, R. & Eitam, A. 2007. Impact of introduction of  
529 *Bactrocera dorsalis* (Diptera: Tephritidae) and classical biological control  
530 releases of *Fopius arisanus* (Hymenoptera: Braconidae) on economically  
531 important fruit flies in French Polynesia. *Journal of Economic Entomology*, 100,  
532 670-679.
- 533 Vélez, M. J. & Brockmann, H. J. 2006. Seasonal variation in selection on male calling  
534 song in the field cricket, *Gryllus rubens*. *Animal Behaviour*, 72, 439-448.
- 535 Vincent, C. M. & Bertram, S. M. 2009. The parasitoid fly *Ormia ochracea* (Diptera:  
536 Tachinidae) can use juvenile crickets as hosts. *Florida Entomologist*, 92, 598-600.
- 537 Vinson, S. B. 1990. How parasitoids deal with the immune system of their host: an  
538 overview. *Archs Insect Biochem Physiol*, 13, 3-27.
- 539 Wagner, W. E. & Basolo, A. L. 2007. Host preferences in a phonotactic parasitoid of  
540 field crickets: the relative importance of host song characters. *Ecological*  
541 *Entomology*, 32, 478-484.
- 542 Wagner, W. E., Jr. 1996. Convergent song preferences between female field crickets and  
543 acoustically orienting parasitoid flies. *Behavioral Ecology*, 7, 279-285.
- 544 Walker, T. J. 1974. *Gryllus ovisopis* N. SP.: a taciturn cricket with a life cycle suggesting  
545 allochronic speciation. *Florida Entomologist*, 57, 13-22.

- 546 Walker, T. J. 1989. A live trap for monitoring *Euphasiopteryx* and tests with *E. ochracea*  
547 [Diptera: Tachinidae]. *Florida Entomologist*, 72, 314-319.
- 548 Walker, T. J. 1993. Phonotaxis in female *Ormia ochracea* (Diptera: Tachinidae), a  
549 parasitoid of field crickets. *Journal of Insect Behavior*, 6, 389-410.
- 550 Walker, T. J. 2001. *Gryllus cayensis* n.sp. (Orthoptera: Gryllidae), a taciturn wood cricket  
551 extirpated from the Florida Keys: songs, ecology and hybrids. *Florida*  
552 *Entomologist*, 84, 700-705.
- 553 Walker, T. J. & Wineriter, S. A. 1991. Hosts of a phonotactic parasitoid and levels of  
554 parasitism (Diptera: Tachinidae: *Ormia ochracea*). *Florida Entomologist*, 74,  
555 554-559.
- 556 Weir, B. S. & Cockerham, C. C. 1984. Estimating F<sub>ST</sub> statistics for the analysis of  
557 population structure. *Evolution*, 38, 1358-1370.
- 558 Weissman, D. B., Rentz, D. C. F., Alexander, R. D. & Loher, W. 1980. Field crickets  
559 (*Gryllus* and *Acheta*) of California and Baja California, Mexico (Orthoptera:  
560 Gryllidae: Gryllinae). *Trans. Am. Entomol. Soc.*, 106, 327-356.
- 561 Weissman, D. B., Walker, T. J. & Gray, D. A. 2009. The Jamaican field cricket *Gryllus*  
562 *assimilis* and two new sister species (Orthoptera: Gryllidae). *Annals of the*  
563 *Entomological Society of America*, 102, 367-380.
- 564 Wineriter, S. A. & Walker, T. J. 1990. Rearing phonotactic parasitoid flies (Diptera:  
565 Tachinidae, Ormiini, *Ormia* spp.). *Entomophaga*, 35, 621-632.
- 566 Zuk, M., Simmons, L. W. & Cupp, L. 1993. Calling characteristics of parasitized and  
567 unparasitized populations of the field cricket *Teleogryllus oceanicus*. *Behavioral*  
568 *Ecology and Sociobiology*, 33, 339-343.
- 569 Zuk, M., Simmons, L. W. & Rotenberry, J. T. 1995. Acoustically-orienting parasitoids in  
570 calling and silent males of the field cricket *Teleogryllus oceanicus*. *Ecological*  
571 *Entomology*, 20, 380-383.
- 572

573

574 Table 1. Sample collection data; not all specimens were used in all analyses.

| <b>Region</b>           | <b>Locality</b>                | <b>Dates</b>                      | <b>N</b> | <b>Collector(s)</b>               |
|-------------------------|--------------------------------|-----------------------------------|----------|-----------------------------------|
| <b>Florida</b>          | Gainesville, FL                | Aug. 2002                         | 41       | DAG                               |
| <b>Texas</b>            | San Antonio, TX                | Sept. 2002                        | 5        | WHC                               |
|                         | Austin, TX                     | Sept. 2002,<br>2004               | 29       | WHC & S. Walker 2002;<br>DAG 2004 |
|                         | Huntsville, TX                 | Sept. 2002                        | 1        | S. Walker                         |
| <b>Arizona</b>          | Sedona, AZ                     | Aug. 2004                         | 12       | DAG                               |
|                         | Oak Creek, AZ                  | Aug. 2004                         | 6        | DAG                               |
|                         | Holbrook, AZ                   | Aug. 2002                         | 1        | DAG                               |
|                         | Verde River, AZ                | Aug. 2004                         | 3        | DAG                               |
|                         | Madera Canyon, AZ              | Aug. 2004                         | 10       | DAG                               |
|                         | KOFA, AZ                       | Sept. 2005                        | 2        | DAG                               |
|                         | Yuma, AZ                       | Nov. 2003                         | 2        | A. Izzo                           |
|                         | Parker Canyon, AZ              | Aug. 2004                         | 2        | DAG                               |
|                         | Petroglyph, AZ                 | Sept. 2006                        | 16       | DAG                               |
|                         | Pinery Canyon, AZ              | Sept. 2004                        | 5        | DAG                               |
|                         | Portal, AZ                     | Aug. 2003                         | 1        | DAG                               |
| <b>Sonora</b>           | Alamos, Sonora, MX             | July 2006                         | 17       | DAG                               |
| <b>Oaxaca</b>           | San Pablo Etna,<br>Oaxaca, MX  | Nov. 2014                         | 13       | DAG                               |
| <b>California</b>       | Malibu Creek, CA               | Sept. & Oct.<br>2003, 2004        | 22       | DAG                               |
|                         | Stunt Ranch, CA                | Sept. 2002                        | 10       | DAG                               |
|                         | Santa Margarita<br>Reserve, CA | Sept. 2003                        | 5        | DAG                               |
| <b>Hawaii</b>           | Kauai, HI                      | Feb. & Aug.<br>2014               | 24       | MZ & SLB                          |
|                         | Hilo, HI                       | Mar. 2003;<br>Feb. & Aug.<br>2014 | 33       | WHC 2003; MZ & SLB<br>2014        |
|                         | Oahu, HI                       | Feb. 2014                         | 4        | MZ & SLB                          |
| <b>Outgroups</b>        |                                |                                   |          |                                   |
| <i>Ormia depleta</i>    | Gainesville, FL                | Dec. 2003                         | 2        | H. Frank, via T. J.<br>Walker     |
| <i>Ormia lineifrons</i> | Gainesville, FL                | Dec. 2003                         | 2        | H. Frank, via T. J.<br>Walker     |



576 **Table 2. Locus primer and allelic richness statistics**

577

578

579

580

581

582

583

584

585

586

587

588

589

590

591

592

593

594

595

596

597

598

599

600

601

602

603

| Locus | Primer sequence 5'-3'                                       | Repeat locus |     |           |          | Mean number of alleles |       |       |      |      |      |      |      |      |       | Mean number of private alleles |       |      |      |      |      |      |      |      |  |
|-------|-------------------------------------------------------------|--------------|-----|-----------|----------|------------------------|-------|-------|------|------|------|------|------|------|-------|--------------------------------|-------|------|------|------|------|------|------|------|--|
|       |                                                             | motif        | no. | size (bp) | Pool Dye | HI(K)                  | HI(O) | HI(H) | CA   | AZ   | SON  | OAX  | TX   | FL   | HI(K) | HI(O)                          | HI(H) | CA   | AZ   | SON  | OAX  | TX   | FL   |      |  |
| Oo002 | F: GTGTG TGAGCG TCTGATCTTCC<br>R: ATGAGCCACATTTACACTTTCCC   | CAGC         | 11  | 191       | A VIC    | 2.65                   | 3.57  | 3.17  | 3.64 | 4.76 | 4.22 | 4.02 | 4.49 | 5.58 | 0.00  | 0.01                           | 0.02  | 0.14 | 0.68 | 0.43 | 1.16 | 0.25 | 0.66 |      |  |
| Oo007 | F: TTCCTTTACTATCGTATTGGCGC<br>R: AGGAAGGAAGACAAACAACAGC     | TTG          | 8   | 286       | A 6-FAM  | 1.99                   | 2.41  | 2.20  | 5.27 | 5.46 | 5.11 | 6.73 | 4.69 | 4.68 | 0.00  | 0.13                           | 0.20  | 1.30 | 0.61 | 0.93 | 1.68 | 0.50 | 0.56 |      |  |
| Oo011 | F: CTGCCCTTTCACCTCTACTTGAC<br>R: GAGCTCCCTTGGCAAGTTAAATG    | AACGAC       | 14  | 395       | A PET    | 3.89                   | 3.33  | 3.39  | 4.77 | 5.33 | 5.68 | 4.05 | 7.29 | 7.02 | 0.00  | 0.00                           | 0.00  | 0.07 | 0.68 | 0.82 | 0.00 | 1.20 | 1.40 |      |  |
| Oo017 | F: TCAAAATAGGCGTGGTTTGATG<br>R: TGTCATGATGCAGCATAAACAAC     | TGGA         | 10  | 164       | A 6-FAM  | 2.00                   | 2.00  | 1.99  | 3.36 | 4.97 | 5.49 | 6.44 | 5.05 | 6.01 | 0.00  | 0.00                           | 0.00  | 0.00 | 0.02 | 0.51 | 1.18 | 0.37 | 1.05 |      |  |
| Oo022 | F: AAAGGTGTTAGAAGATGTTGGCG<br>R: GATAATAGCGCTCGTAGTTGCAG    | GGAT         | 9   | 348       | B 6-FAM  | 3.61                   | 2.56  | 2.58  | 6.29 | 7.97 | 6.51 | 8.40 | 7.73 | 7.34 | 0.00  | 0.00                           | 0.00  | 0.82 | 1.18 | 0.84 | 1.42 | 1.46 | 1.54 |      |  |
| Oo024 | F: TATGACGTG CAGCAATAGAGTG<br>R: GTGACGTACGTTTGAAATGCTC     | TTG          | 15  | 164       | B PET    | 2.54                   | 2.24  | 2.22  | 2.89 | 3.77 | 3.93 | 3.52 | 3.48 | 3.69 | 0.55  | 0.21                           | 0.22  | 0.00 | 0.17 | 0.01 | 0.00 | 0.30 | 0.00 |      |  |
| Oo028 | F: TCTTGTGGGTAATGCAATTGTG<br>R: ATTTAA TACGCAGCAA TCCCAGG   | TAG          | 12  | 333       | B NED    | 2.00                   | 2.41  | 2.18  | 4.69 | 5.97 | 7.04 | 6.68 | 5.30 | 5.76 | 0.00  | 0.41                           | 0.20  | 0.64 | 0.58 | 0.16 | 0.39 | 0.18 | 0.21 |      |  |
| Oo031 | F: ACATATGG TGAG TAGTGGATCCC<br>R: ACCAGAAGCTGTCA TATAGGGAG | AAC          | 11  | 387       | B VIC    | 2.70                   | 2.43  | 2.31  | 4.14 | 5.16 | 5.25 | 6.54 | 5.77 | 6.91 | 0.00  | 0.00                           | 0.00  | 0.00 | 0.48 | 0.41 | 0.28 | 0.22 | 1.21 |      |  |
| Oo032 | F: TGAAGTGTGACAGTTTCTTGACG<br>R: ACTGTCAAAGGATGTTAACTGGC    | TTG          | 12  | 416       | A VIC    | 2.94                   | 3.21  | 3.36  | 5.79 | 5.86 | 4.47 | 6.28 | 7.09 | 6.34 | 0.00  | 0.24                           | 0.38  | 1.23 | 0.92 | 0.14 | 1.23 | 1.26 | 0.86 |      |  |
| Oo034 | F: TTGACCAAACCCATTATGTGAC<br>R: TCCG GACTATCGAGATTG TACTG   | ACA          | 12  | 182       | A NED    | 1.92                   | 1.83  | 1.90  | 1.90 | 2.78 | 3.02 | 3.59 | 3.34 | 3.25 | 0.00  | 0.41                           | 0.03  | 0.03 | 0.84 | 0.68 | 1.63 | 0.70 | 0.90 |      |  |
| Oo035 | F: ATTTGCGGTGTTACTTCA TTTGC<br>R: TTGCTTACCAGTTCGCTAATC     | GTT          | 10  | 190       | A PET    | 1.33                   | 2.06  | 1.43  | 2.64 | 4.72 | 6.14 | 6.08 | 6.28 | 6.98 | 0.00  | 0.41                           | 0.00  | 0.07 | 0.63 | 0.79 | 0.34 | 1.15 | 1.87 |      |  |
|       |                                                             |              |     |           |          | Mean                   | 2.51  | 2.55  | 2.43 | 4.12 | 5.16 | 5.17 | 5.67 | 5.50 | 5.78  | 0.05                           | 0.17  | 0.10 | 0.39 | 0.62 | 0.52 | 0.85 | 0.69 | 0.93 |  |
|       |                                                             |              |     |           |          | s.d.                   | 0.73  | 0.55  | 0.60 | 1.32 | 1.25 | 1.13 | 1.53 | 1.42 | 1.32  | 0.16                           | 0.17  | 0.13 | 0.49 | 0.31 | 0.30 | 0.62 | 0.46 | 0.54 |  |



604  
605606 **Table 3. Population sample sizes and heterozygosity for nuclear msat loci.**

| 607        | 608         | 609        | 610                       | 611                       | 612 |
|------------|-------------|------------|---------------------------|---------------------------|-----|
| Population | Sample size | N. alleles | Heterozygosity (expected) | Heterozygosity (observed) |     |
| 611        | 20          | 29         | 0.437                     | 0.367                     |     |
| 612        | 28          | 31         | 0.438                     | 0.367                     |     |
| 613        | 32          | 34         | 0.401                     | 0.321                     |     |
| 614        | 32          | 62         | 0.588                     | 0.478                     |     |
| 615        | 57          | 95         | 0.667                     | 0.612                     |     |
| 616        | 17          | 70         | 0.677                     | 0.588                     |     |
| 617        | 13          | 70         | 0.724                     | 0.607                     |     |
| 618        | 35          | 91         | 0.714                     | 0.604                     |     |
| 619        | 40          | 95         | 0.741                     | 0.638                     |     |

620  
621  
622

623

624 Table 4. Pairwise  $F_{ST}$  (above diagonal) and Nei's genetic distance (below diagonal) by population.

| 625 |                   | <b>Kauai</b> | <b>Oahu</b> | <b>Hilo</b> | <b>California</b> | <b>Arizona</b> | <b>Sonora</b> | <b>Oaxaca</b> | <b>Texas</b> | <b>Florida</b> |
|-----|-------------------|--------------|-------------|-------------|-------------------|----------------|---------------|---------------|--------------|----------------|
| 626 |                   |              |             |             |                   |                |               |               |              |                |
| 627 |                   |              |             |             |                   |                |               |               |              |                |
| 628 | <b>Kauai</b>      | -            | 0.027       | 0.057       | 0.092             | 0.071          | 0.105         | 0.109         | 0.091        | 0.087          |
| 629 |                   |              |             |             |                   |                |               |               |              |                |
| 630 | <b>Oahu</b>       | 0.044        | -           | 0.047       | 0.088             | 0.079          | 0.099         | 0.095         | 0.100        | 0.098          |
| 631 |                   |              |             |             |                   |                |               |               |              |                |
| 632 | <b>Hilo</b>       | 0.096        | 0.073       | -           | 0.114             | 0.097          | 0.124         | 0.118         | 0.127        | 0.122          |
| 633 |                   |              |             |             |                   |                |               |               |              |                |
| 634 | <b>California</b> | 0.263        | 0.229       | 0.279       | -                 | 0.024          | 0.034         | 0.049         | 0.055        | 0.060          |
| 635 |                   |              |             |             |                   |                |               |               |              |                |
| 636 | <b>Arizona</b>    | 0.282        | 0.267       | 0.291       | 0.088             | -              | 0.011         | 0.019         | 0.031        | 0.035          |
| 637 |                   |              |             |             |                   |                |               |               |              |                |
| 638 | <b>Sonora</b>     | 0.290        | 0.286       | 0.344       | 0.127             | 0.067          | -             | 0.032         | 0.026        | 0.026          |
| 639 |                   |              |             |             |                   |                |               |               |              |                |
| 640 | <b>Oaxaca</b>     | 0.327        | 0.305       | 0.365       | 0.235             | 0.151          | 0.169         | -             | 0.022        | 0.021          |
| 641 |                   |              |             |             |                   |                |               |               |              |                |
| 642 | <b>Texas</b>      | 0.331        | 0.332       | 0.394       | 0.231             | 0.165          | 0.149         | 0.158         | -            | 0.008          |
| 643 |                   |              |             |             |                   |                |               |               |              |                |
| 644 | <b>Florida</b>    | 0.337        | 0.336       | 0.388       | 0.273             | 0.187          | 0.167         | 0.171         | 0.045        | -              |
| 645 |                   |              |             |             |                   |                |               |               |              |                |

646

647

648

649

650 Table 5. Confirmed hosts of *Ormia ochracea*.

651

652

| Host Species                                        | Confirmed as Host in      | Song type  | Dominant Frequency (kHz) | Pulse rate (p/s) † | Pulses per chirp or trill * | References for host status and song data                                                                                                  |
|-----------------------------------------------------|---------------------------|------------|--------------------------|--------------------|-----------------------------|-------------------------------------------------------------------------------------------------------------------------------------------|
| <i>G. rubens</i>                                    | Florida                   | trill      | 4.7                      | 50-55              | 100-200                     | (Walker and Wineriter, 1991, Vélez and Brockmann, 2006, Izzo and Gray, 2004, Blankers et al., 2015)                                       |
| <i>G. firmus</i>                                    | Florida, Texas            | chirp      | 4.2                      | 16                 | 3-5                         | (Walker and Wineriter, 1991, Doherty and Storz, 1992); D. Weissman pers. com.                                                             |
| <i>G. texensis</i>                                  | Texas, Oklahoma, Coahuila | trill      | 5.2                      | 75-80              | 25-65                       | (Cade, 1975, Cade, 1981, Cade et al., 1996, Gray and Cade, 1999, Izzo and Gray, 2004, Blankers et al., 2015); DAG; D. Weissman pers. com. |
| <i>G. assimilis</i>                                 | Texas, Oaxaca, Nuevo Leon | chirp      | 3.7                      | 85                 | 6-9                         | DAG; D. Weissman pers. com. (Weissman et al., 2009)                                                                                       |
| <i>G. personatus</i>                                | Arizona, Coahuila         | chirp      | 4.0                      | 57                 | 6-8                         | DAG; D. Weissman pers. com. (Gray et al., 2016b)                                                                                          |
| <i>G. vocalis</i><br>a.k.a. Regular stutter-triller | Arizona                   | Fast chirp | 4.8                      | 33                 | 3-4                         | D. Weissman pers. com. (Weissman et al., 1980, Sakaguchi and Gray, 2011)                                                                  |

|                                                         |                                                                   |               |     |    |            |                                                                                    |
|---------------------------------------------------------|-------------------------------------------------------------------|---------------|-----|----|------------|------------------------------------------------------------------------------------|
| <i>G. "staccato"</i><br>a.k.a. G#15                     | Arizona, Sonora                                                   | chirp         | 5.2 | 73 | 6-8        | (Sakaguchi and Gray, 2011, Gray et al., 2016b); DAG                                |
| <i>G. armatus</i>                                       | Arizona                                                           | stutter-trill | 3.6 | 58 | 2, 15-20   | (Hedrick and Kortet, 2006); DAG                                                    |
| <i>G. "montis"</i>                                      | Arizona                                                           | chirp         | 3.8 | 22 | 4-5        | DAG                                                                                |
| <i>G. "longicercus"</i><br>a.k.a. G#13                  | Arizona                                                           | chirp         | 4.5 | 10 | 4-6        | DAG; D. Weissman pers. com. (Gray et al., 2016a)                                   |
| <i>G. "lightfooti"</i>                                  | Arizona                                                           | chirp         | 4.5 | 20 | 4-6        | DAG; D. Weissman pers. com.                                                        |
| <i>G. multipulsator</i>                                 | Arizona, Sonora, Jalisco, Zacatecas, Sinaloa, Baja California Sur | chirp         | 4.1 | 70 | 12-16      | A. Izzo; DAG; D. Weissman pers. com. (Weissman et al., 2009)                       |
| <i>G. "regularis"</i><br>a.k.a. G#14, Arizona triller   | Arizona                                                           | trill         | 4.5 | 38 | 20-80      | (Sakaguchi and Gray, 2011, Blankers et al., 2015); DAG                             |
| <i>G. cohni</i><br>a.k.a. G#20, Arizona stutter-triller | Arizona, Sonora                                                   | stutter-trill | 4.8 | 25 | 2-8, 1-6   | (Sakaguchi and Gray, 2011); DAG                                                    |
| <i>G. "saxatilis"</i><br>a.k.a. G#2                     | California, Baja California Norte                                 | chirp         | 4.1 | 20 | 3-4        | DAG; D. Weissman pers. com.                                                        |
| <i>G. lineaticeps</i>                                   | California                                                        | chirp         | 5.1 | 55 | 6-8        | (Wagner, 1996, Wagner and Basolo, 2007, Gray et al., 2016b); DAG                   |
| <i>G. integer</i>                                       | California                                                        | stutter-trill | 4.5 | 60 | 2-3, 15-80 | (Hedrick and Kortet, 2006, Paur and Gray, 2011a, Hedrick and Weber, 1998, Weissman |

|                               |        |                                          |     |          |                |                                      |
|-------------------------------|--------|------------------------------------------|-----|----------|----------------|--------------------------------------|
|                               |        |                                          |     |          |                | et al., 1980)                        |
| <i>Teleogryllus oceanicus</i> | Hawaii | complex 2-part trill // stutter-trill ** | 4.6 | 14 // 24 | 6-8 // 2, 8-10 | (Zuk et al., 1995, Zuk et al., 1993) |

653

654

655 † Pulse rates approximate the average at 25 °C.

656 \* For stutter-trillers, numbers are given as pulses per chirp, chirps per trill.

657 \*\* For the *T. oceanicus* 2-part song, numbers are given as trill part 1 // stutter-trill part 2.



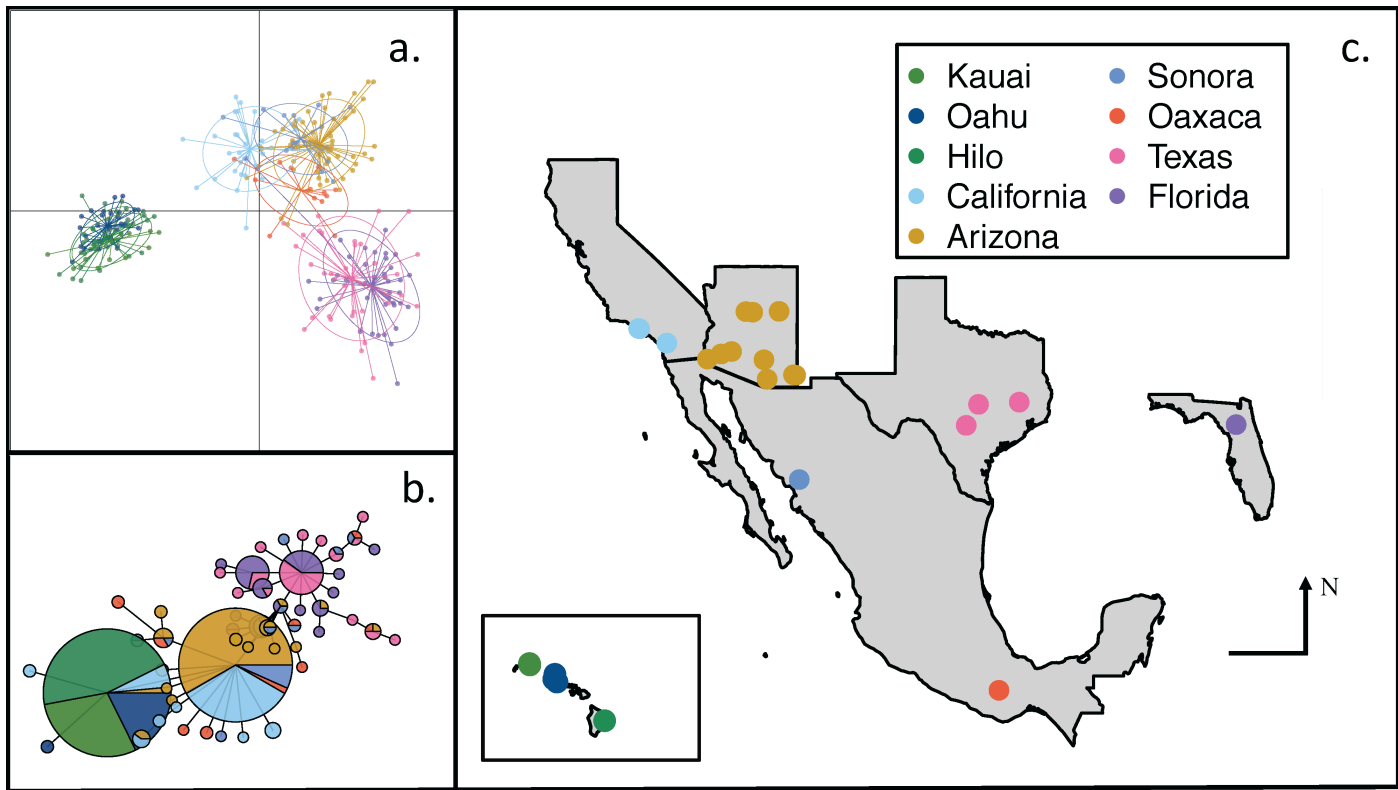

Figure 1. a) DAPC clustering analysis. Individuals are marked as points with ellipses representing 75% of the observed data. b) Haplotype network of 55 haplotypes of 1111bp of mitochondrial COI gene sequences. c) Map of collection sites.

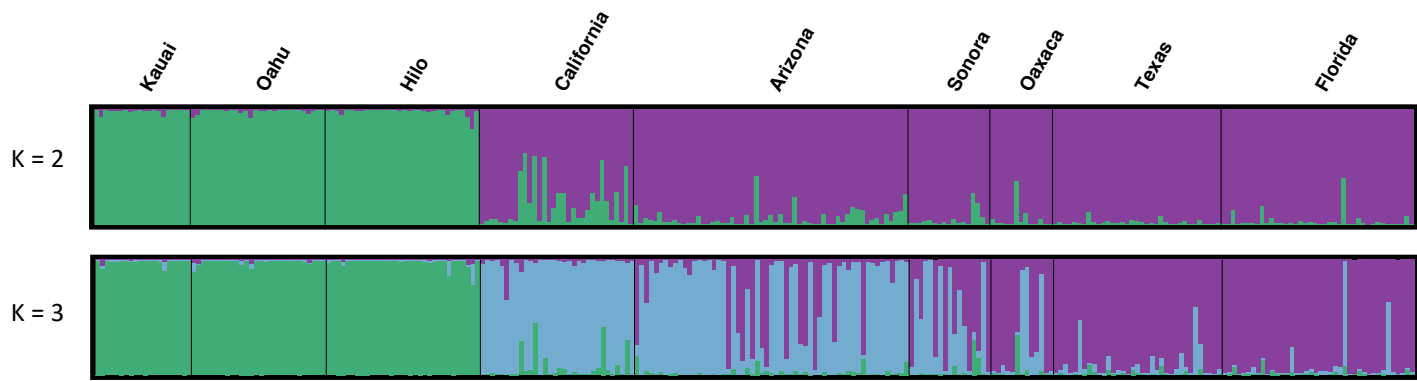

Figure 2. Bayesian clustering analysis implemented by STRUCTURE software (Pritchard et al. 2000). Top panel shows clustering into two genetic groups ( $K = 2$ ) and the bottom panel shows clustering into three genetic groups ( $K = 3$ ).



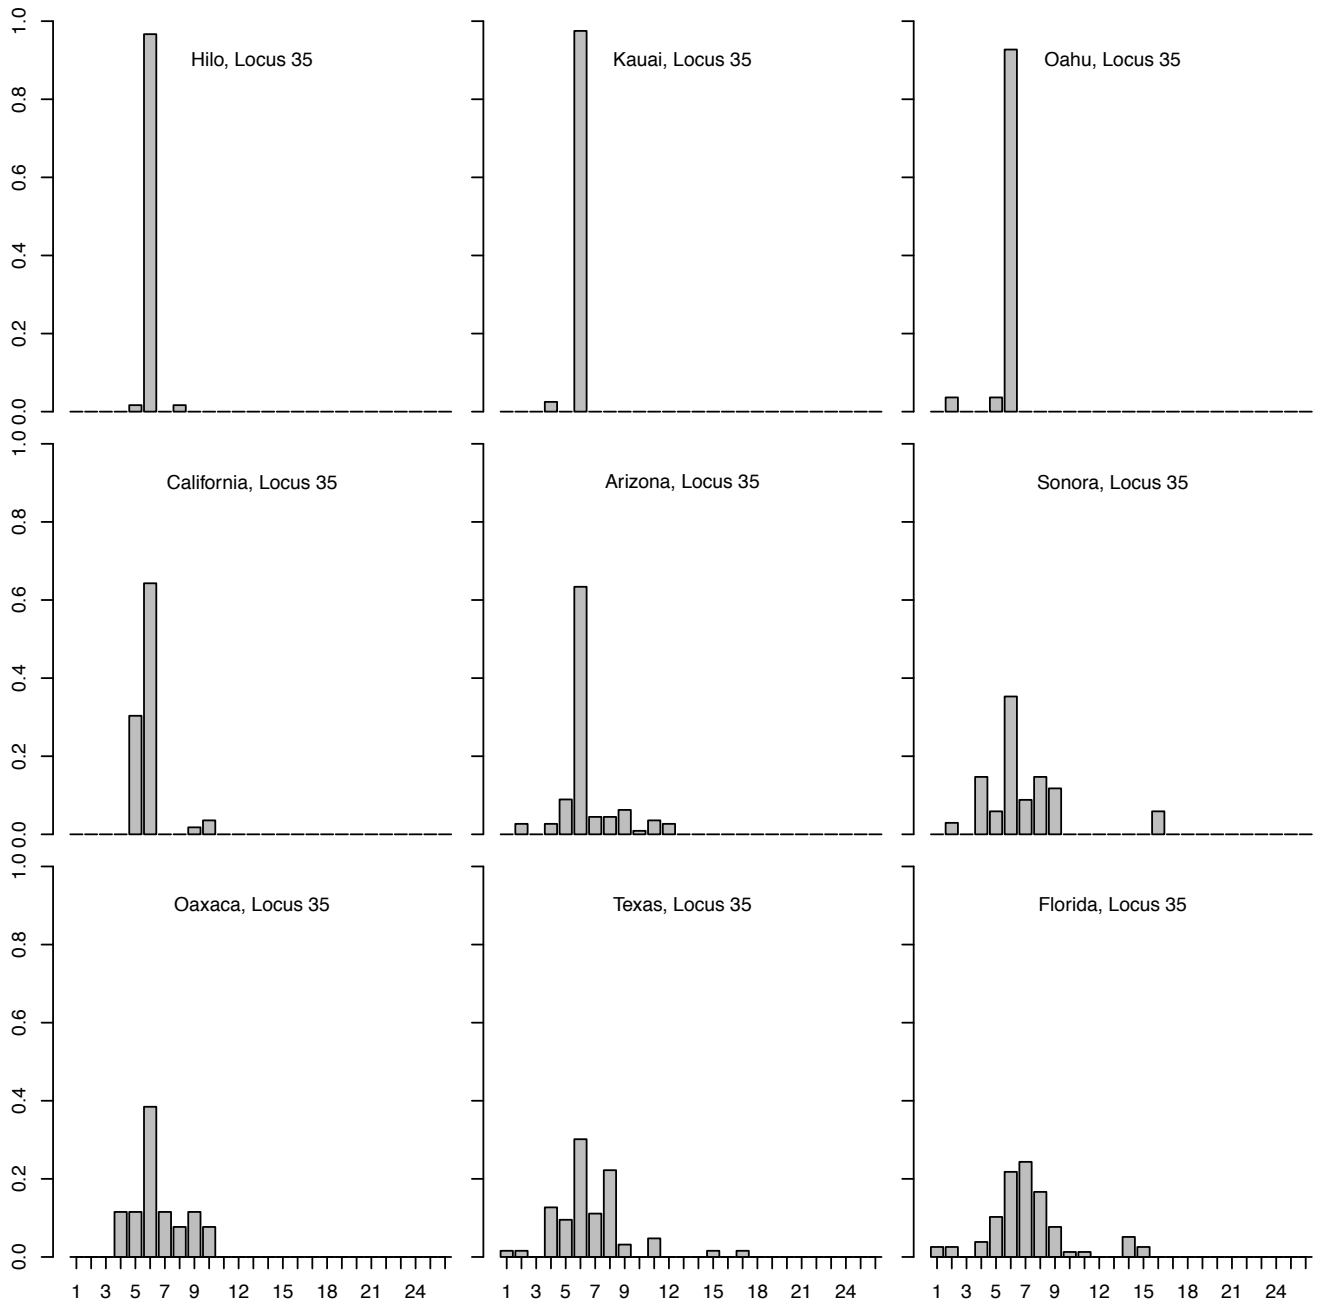

Figure 3. Allele frequency histograms for msat locus 35 for each population.

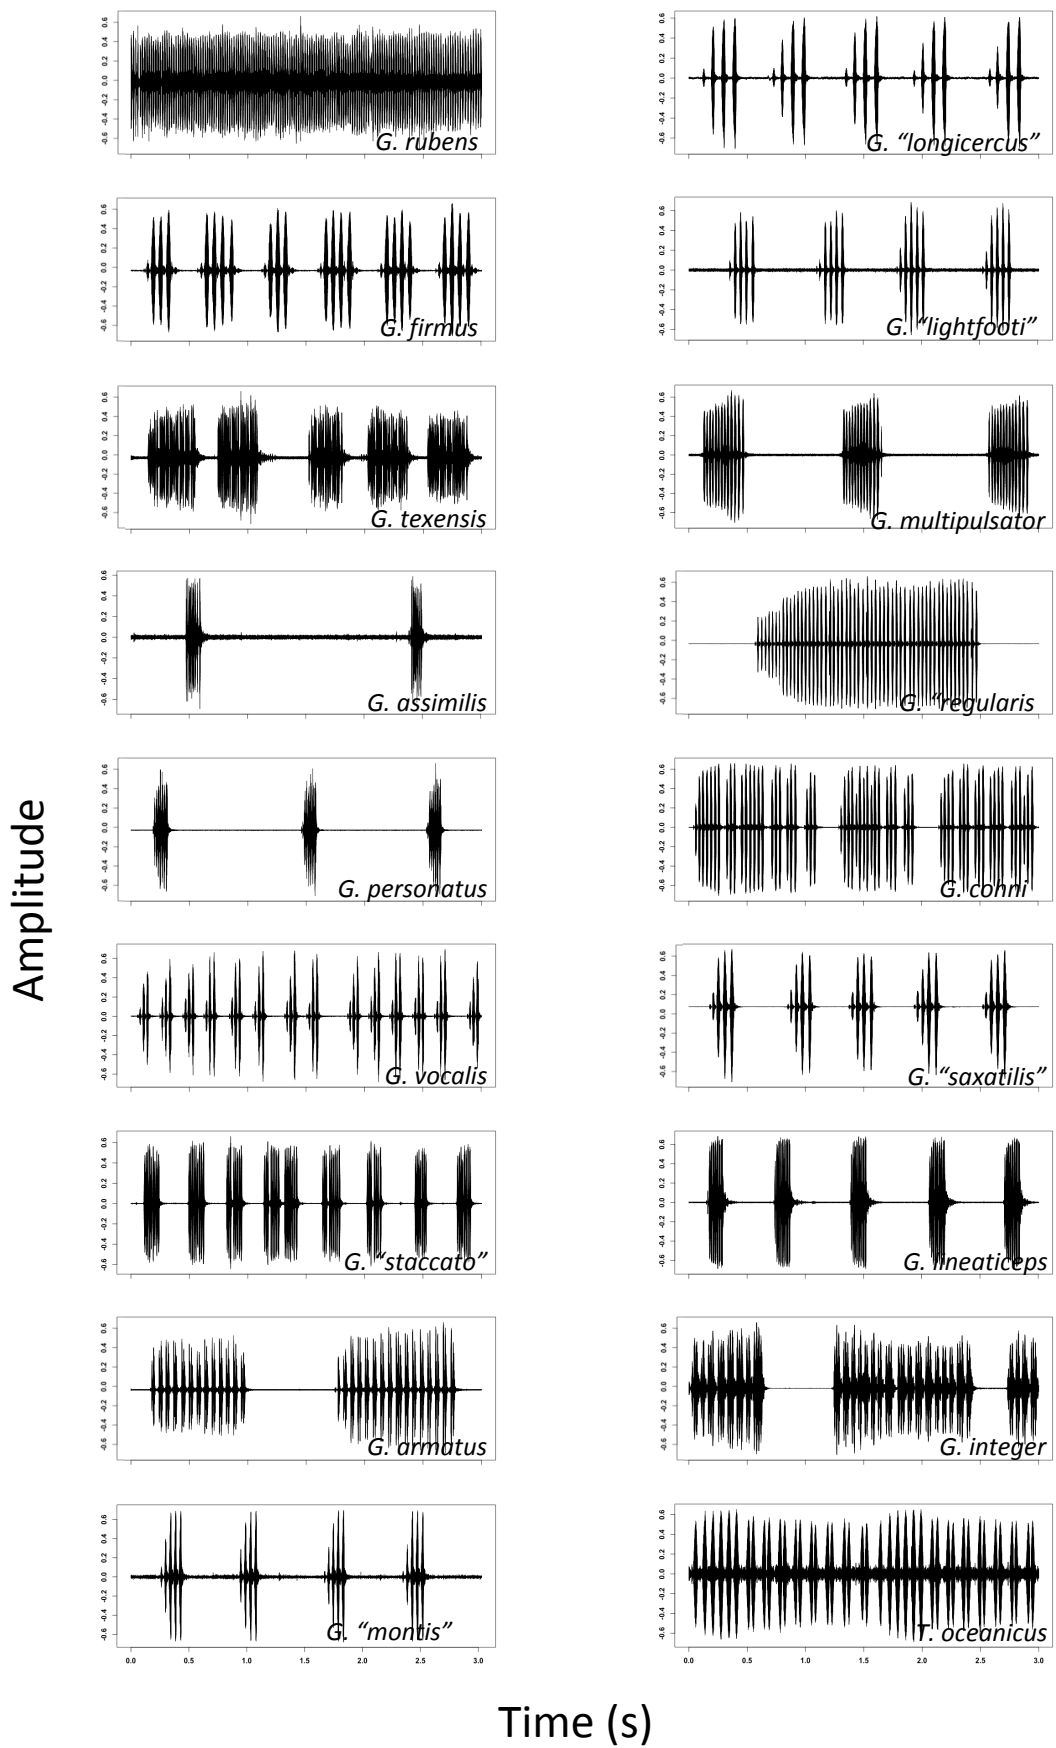

Figure 4. Waveform oscillograms of 3 seconds of song from confirmed host species showing overall song structure (chirps/trills).

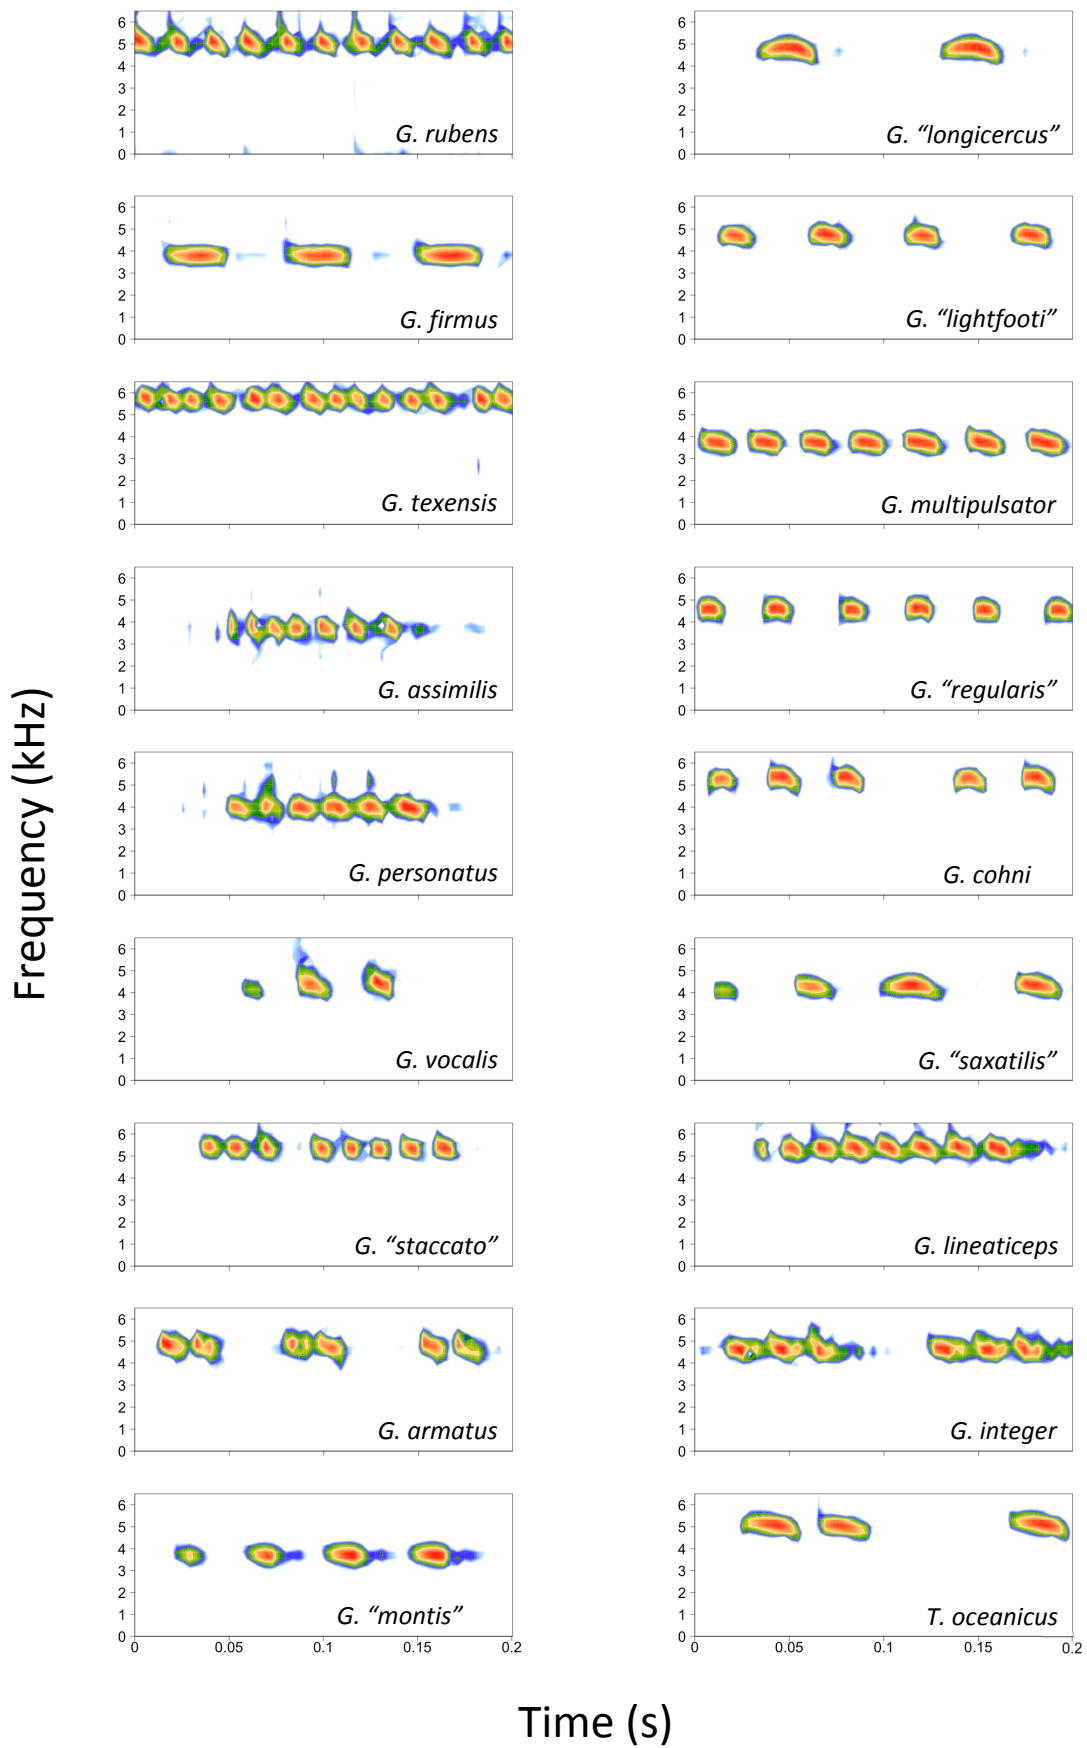

Figure 5. Spectrogram representations of 0.2 seconds of song from confirmed host species showing fine-scale song structure (pulses).

|                         | <i>G. rubens</i> | <i>G. firmus</i> | <i>G. texensis</i> | <i>G. assimilis</i> | <i>G. personatus</i> | <i>G. vocalis</i> | <i>G. "staccato"</i> | <i>G. armatus</i> | <i>G. "montis"</i> | <i>G. "longicercus"</i> | <i>G. "lightfooti"</i> | <i>G. multipulsator</i> | <i>G. "regularis"</i> | <i>G. cohni</i> | <i>G. "saxatilis"</i> | <i>G. lineaticeps</i> | <i>G. integer</i> |
|-------------------------|------------------|------------------|--------------------|---------------------|----------------------|-------------------|----------------------|-------------------|--------------------|-------------------------|------------------------|-------------------------|-----------------------|-----------------|-----------------------|-----------------------|-------------------|
| <i>G. firmus</i>        | 4.01             |                  |                    |                     |                      |                   |                      |                   |                    |                         |                        |                         |                       |                 |                       |                       |                   |
| <i>G. texensis</i>      | 2.21             | 4.46             |                    |                     |                      |                   |                      |                   |                    |                         |                        |                         |                       |                 |                       |                       |                   |
| <i>G. assimilis</i>     | 3.90             | 3.36             | 3.79               |                     |                      |                   |                      |                   |                    |                         |                        |                         |                       |                 |                       |                       |                   |
| <i>G. personatus</i>    | 3.79             | 2.62             | 3.49               | 1.76                |                      |                   |                      |                   |                    |                         |                        |                         |                       |                 |                       |                       |                   |
| <i>G. vocalis</i>       | 3.91             | 1.68             | 3.96               | 3.70                | 3.30                 |                   |                      |                   |                    |                         |                        |                         |                       |                 |                       |                       |                   |
| <i>G. "staccato"</i>    | 3.27             | 3.35             | 2.33               | 3.36                | 3.22                 | 2.22              |                      |                   |                    |                         |                        |                         |                       |                 |                       |                       |                   |
| <i>G. armatus</i>       | 5.44             | 4.21             | 5.17               | 3.63                | 3.33                 | 4.82              | 5.08                 |                   |                    |                         |                        |                         |                       |                 |                       |                       |                   |
| <i>G. "montis"</i>      | 4.29             | 1.15             | 5.01               | 3.19                | 3.00                 | 2.23              | 3.87                 | 4.28              |                    |                         |                        |                         |                       |                 |                       |                       |                   |
| <i>G. "longicercus"</i> | 4.04             | 1.41             | 4.74               | 4.22                | 3.80                 | 1.38              | 3.40                 | 5.18              | 1.69               |                         |                        |                         |                       |                 |                       |                       |                   |
| <i>G. "lightfooti"</i>  | 3.84             | 1.40             | 4.47               | 3.88                | 3.58                 | 1.10              | 3.05                 | 5.02              | 1.61               | 0.44                    |                        |                         |                       |                 |                       |                       |                   |
| <i>G. multipulsator</i> | 2.91             | 2.74             | 2.89               | 1.20                | 1.38                 | 2.99              | 2.56                 | 3.84              | 2.86               | 3.51                    | 3.19                   |                         |                       |                 |                       |                       |                   |
| <i>G. "regularis"</i>   | 1.50             | 2.88             | 3.02               | 3.64                | 3.52                 | 2.86              | 3.09                 | 4.97              | 3.04               | 2.71                    | 2.54                   | 2.70                    |                       |                 |                       |                       |                   |
| <i>G. cohni</i>         | 3.74             | 2.61             | 3.75               | 4.30                | 3.65                 | 2.38              | 3.23                 | 3.89              | 3.18               | 2.70                    | 2.63                   | 3.60                    | 2.80                  |                 |                       |                       |                   |
| <i>G. "saxatilis"</i>   | 4.01             | 0.28             | 4.47               | 3.14                | 2.47                 | 1.78              | 3.37                 | 4.07              | 0.97               | 1.56                    | 1.50                   | 2.58                    | 2.88                  | 2.70            |                       |                       |                   |
| <i>G. lineaticeps</i>   | 3.58             | 3.18             | 2.39               | 3.47                | 2.38                 | 2.85              | 1.96                 | 4.56              | 4.05               | 3.82                    | 3.61                   | 2.57                    | 3.58                  | 3.25            | 3.23                  |                       |                   |
| <i>G. integer</i>       | 5.61             | 5.15             | 5.24               | 5.17                | 4.97                 | 5.06              | 5.05                 | 3.05              | 5.38               | 5.52                    | 5.36                   | 4.97                    | 5.26                  | 4.14            | 5.12                  | 5.02                  |                   |
| <i>T. oceanicus</i>     | 8.24             | 7.61             | 7.93               | 8.17                | 7.57                 | 7.79              | 8.02                 | 7.07              | 7.97               | 8.02                    | 8.00                   | 7.91                    | 7.95                  | 6.86            | 7.63                  | 7.52                  | 7.52              |

Figure 6. Euclidean pairwise inter-host song distances with heatmap colors indicating similar songs (green) or strongly divergent songs (red).

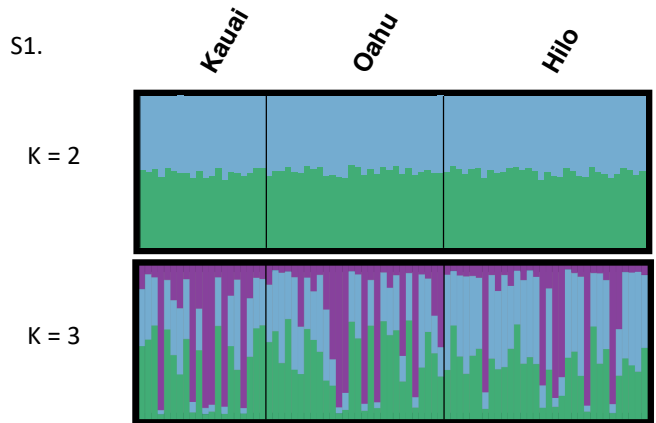

Supplemental Figure S1. STRUCTURE plots for Hawaii flies (K=2 and K=3)

S2.

California

Arizona

Sonora

Oaxaca

Texas

Florida

K = 2

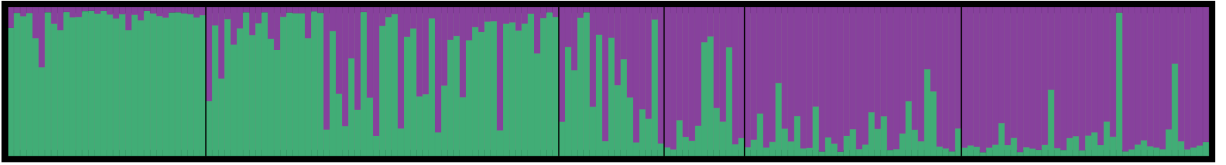

K = 3

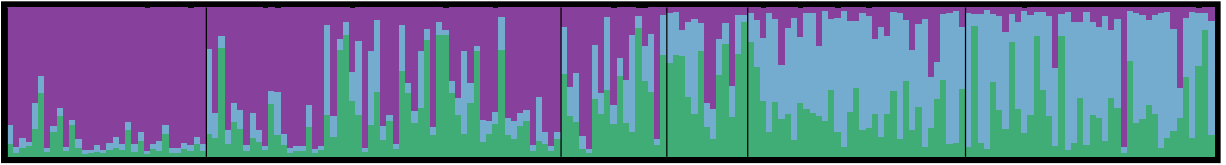

K = 6

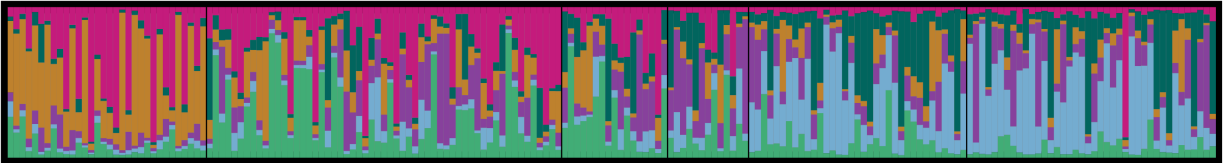

Supplemental Figure S2. STRUCTURE plots for mainland flies (K=2, K=3, and K=6)

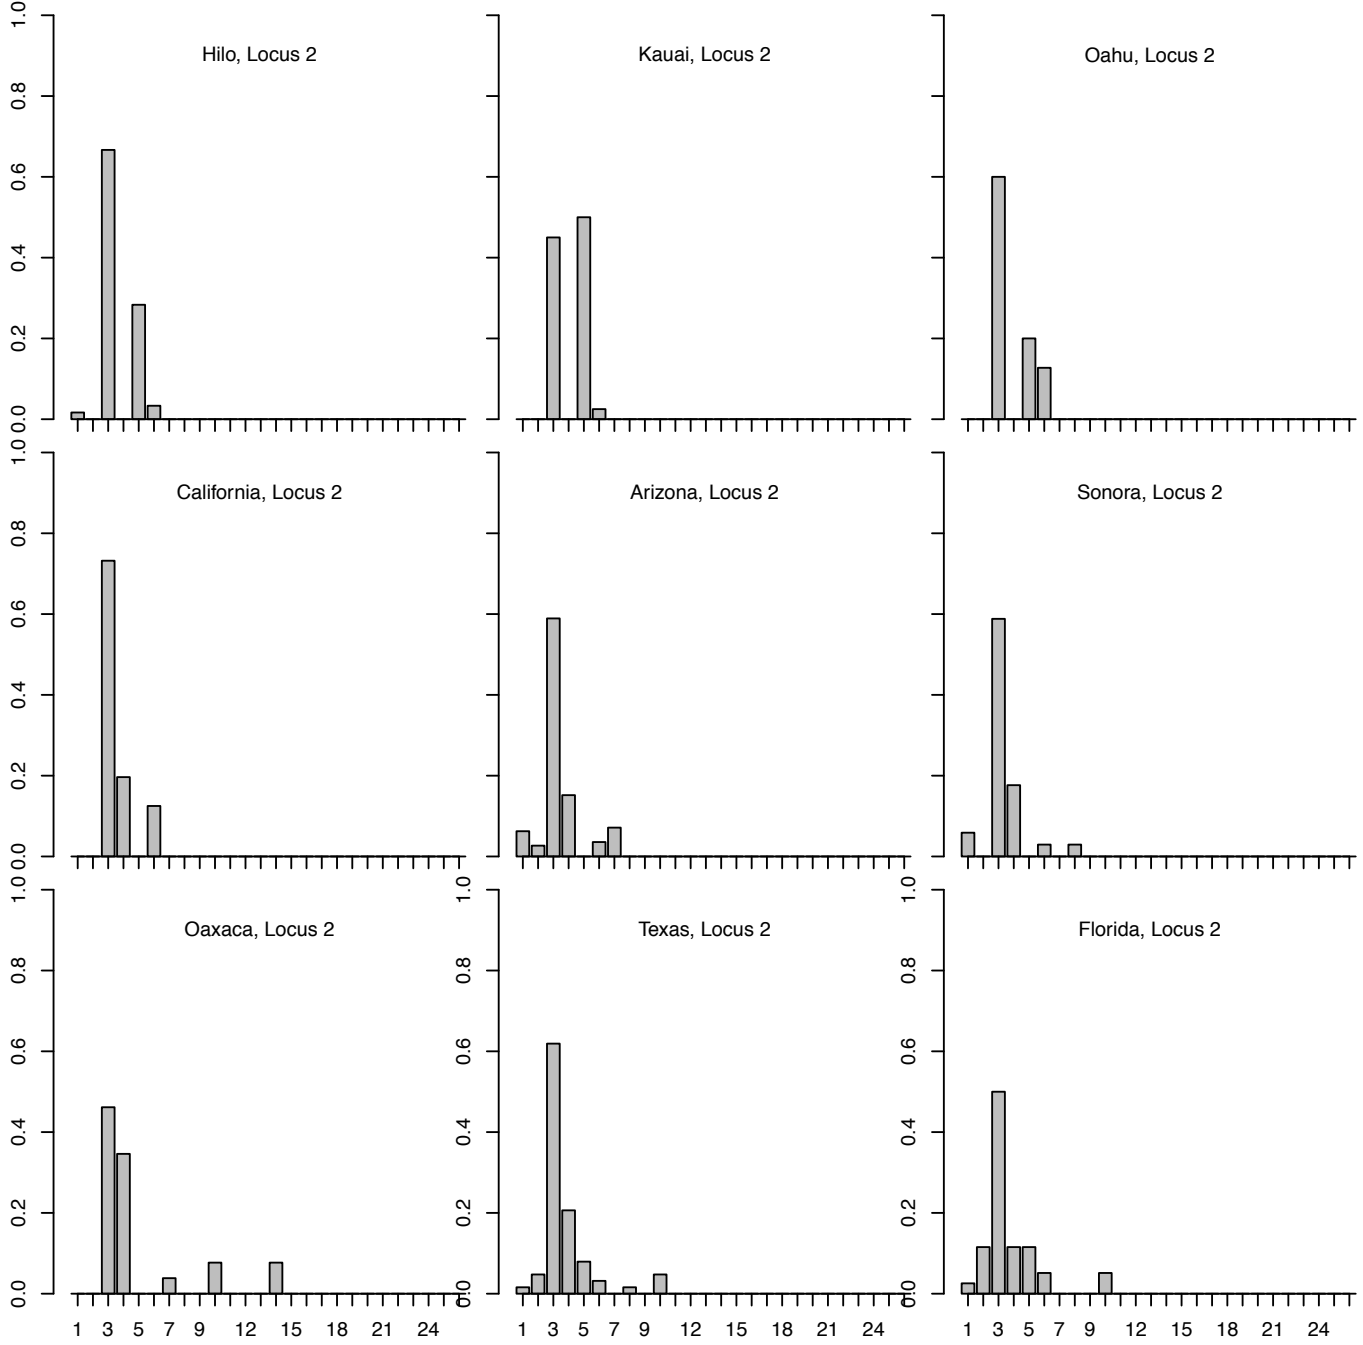

Supplemental Figure S3. Allele frequency histograms for msat locus 2 for each population.

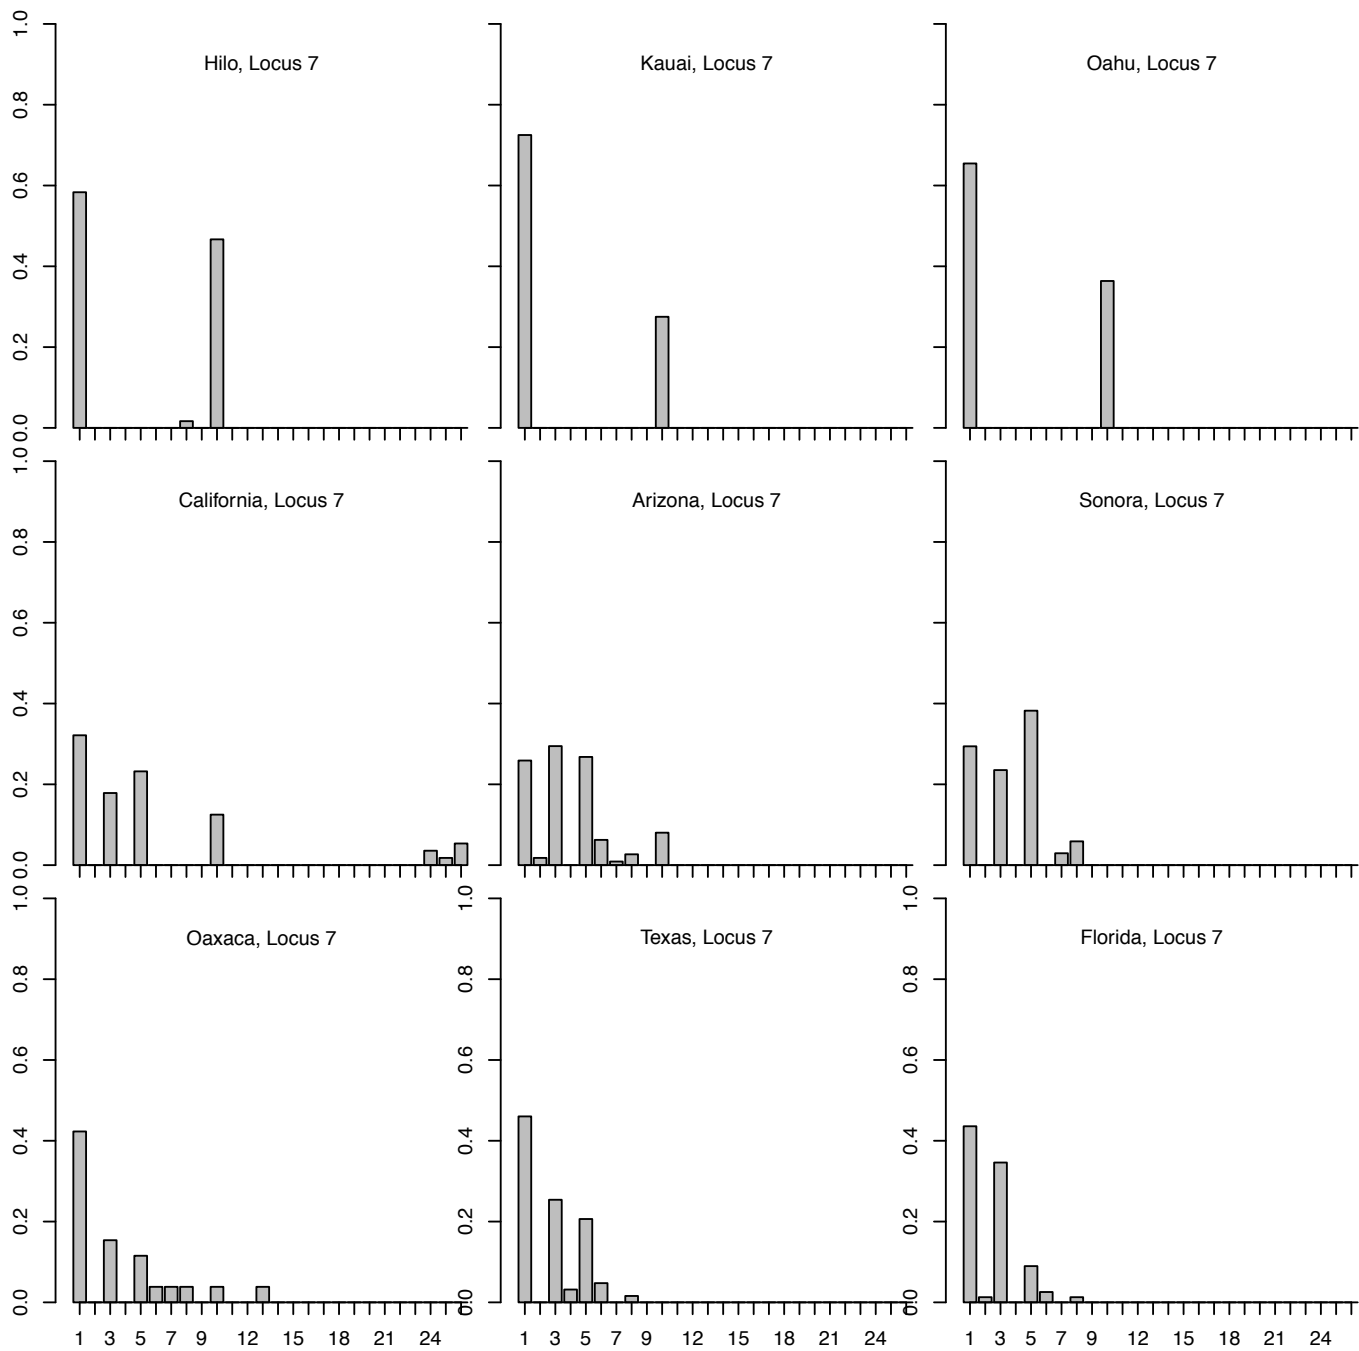

Supplemental Figure S4. Allele frequency histograms for msat locus 7 for each population.



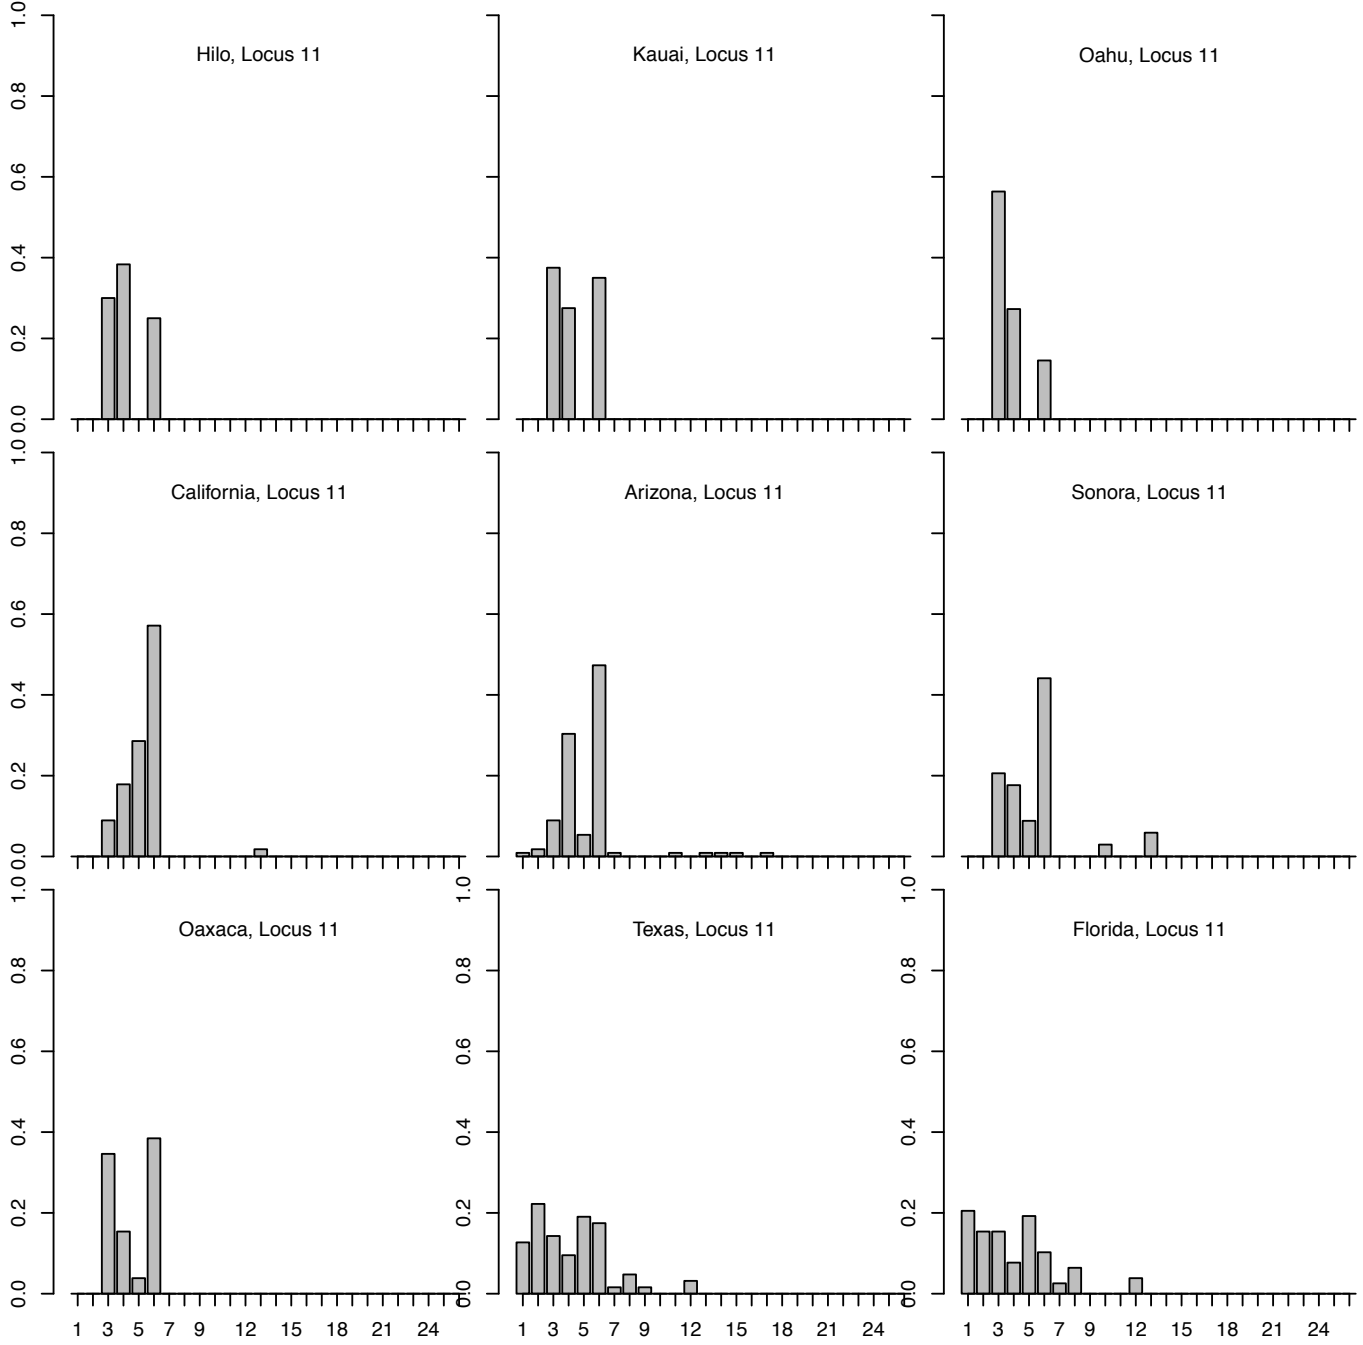

Supplemental Figure S5. Allele frequency histograms for msat locus 11 for each population.

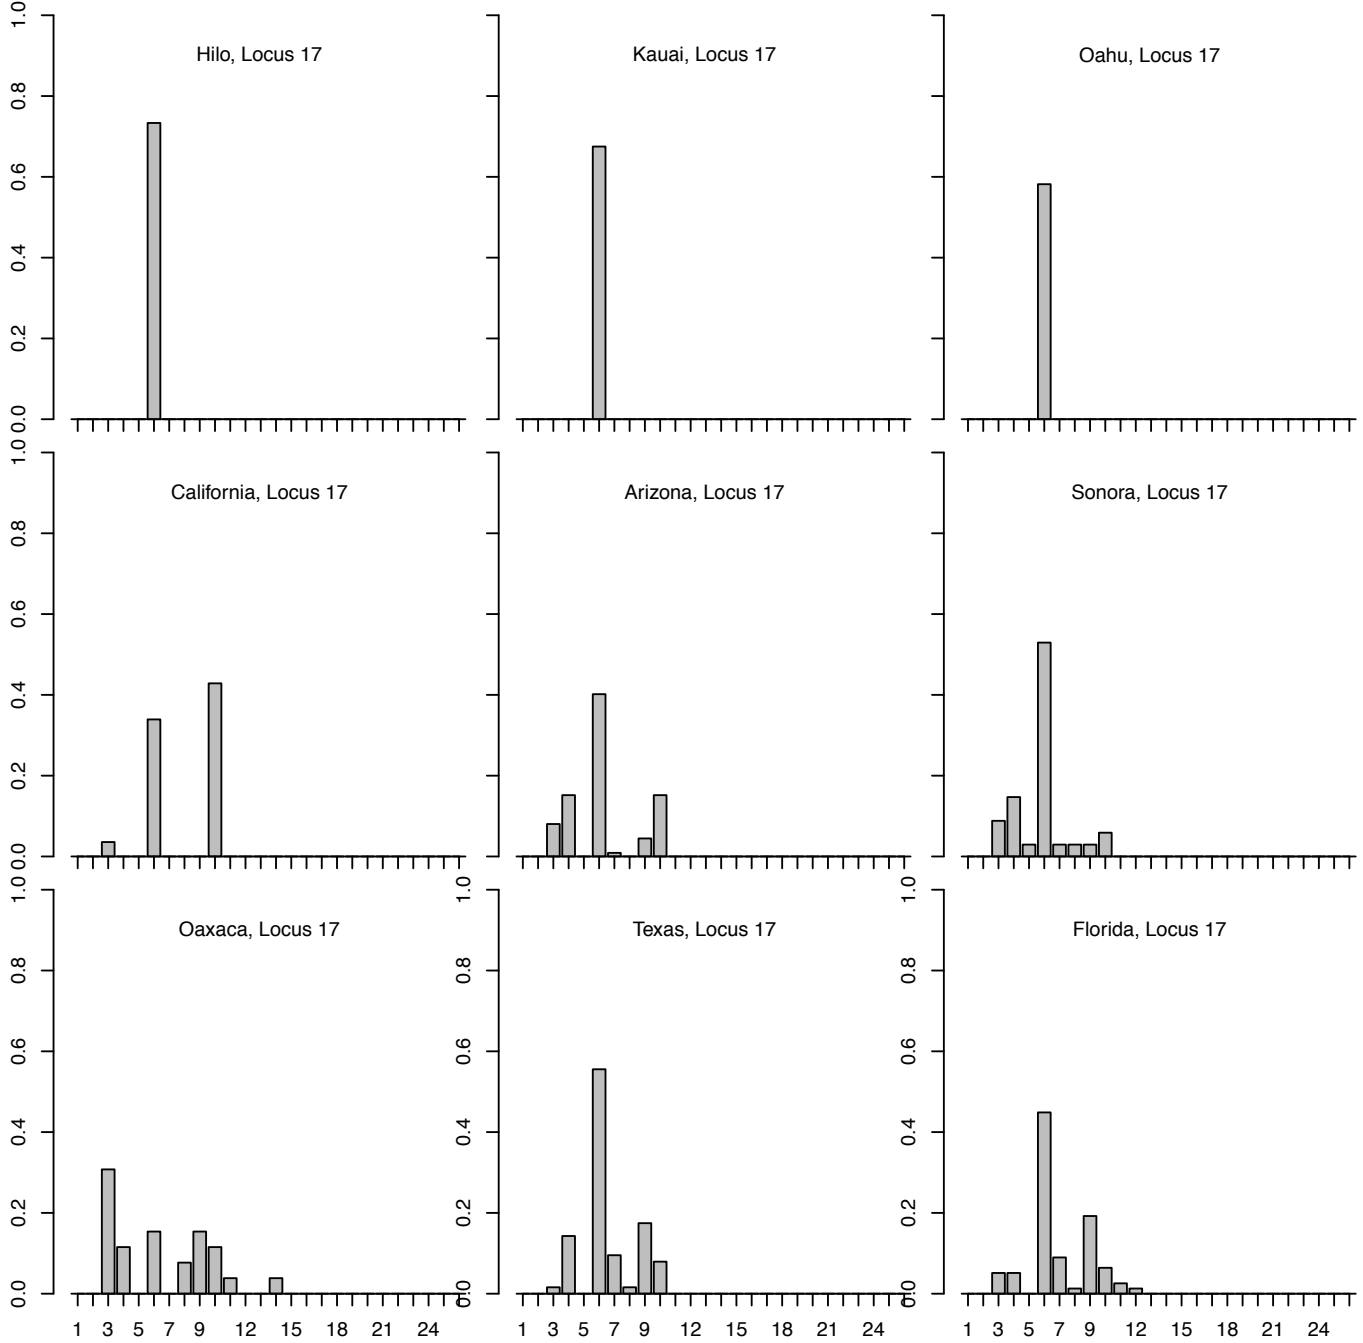

Supplemental Figure S6. Allele frequency histograms for msat locus 17 for each population.

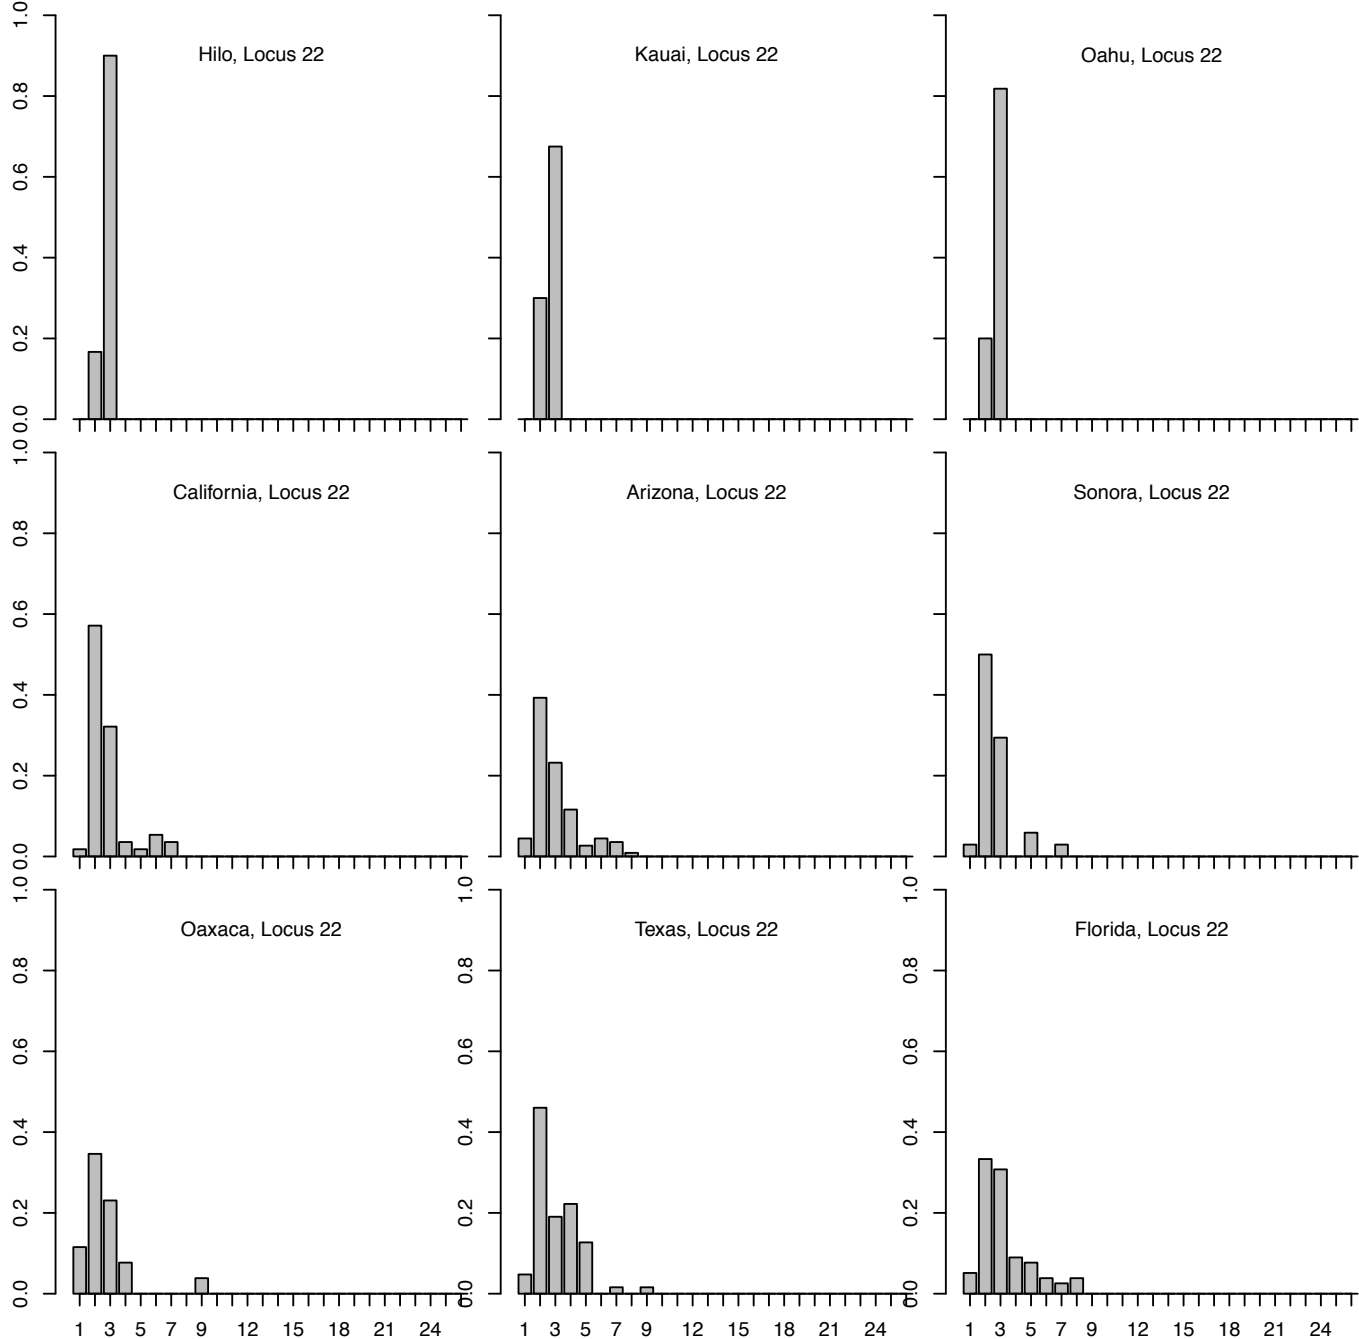

Supplemental Figure S7. Allele frequency histograms for msat locus 22 for each population.

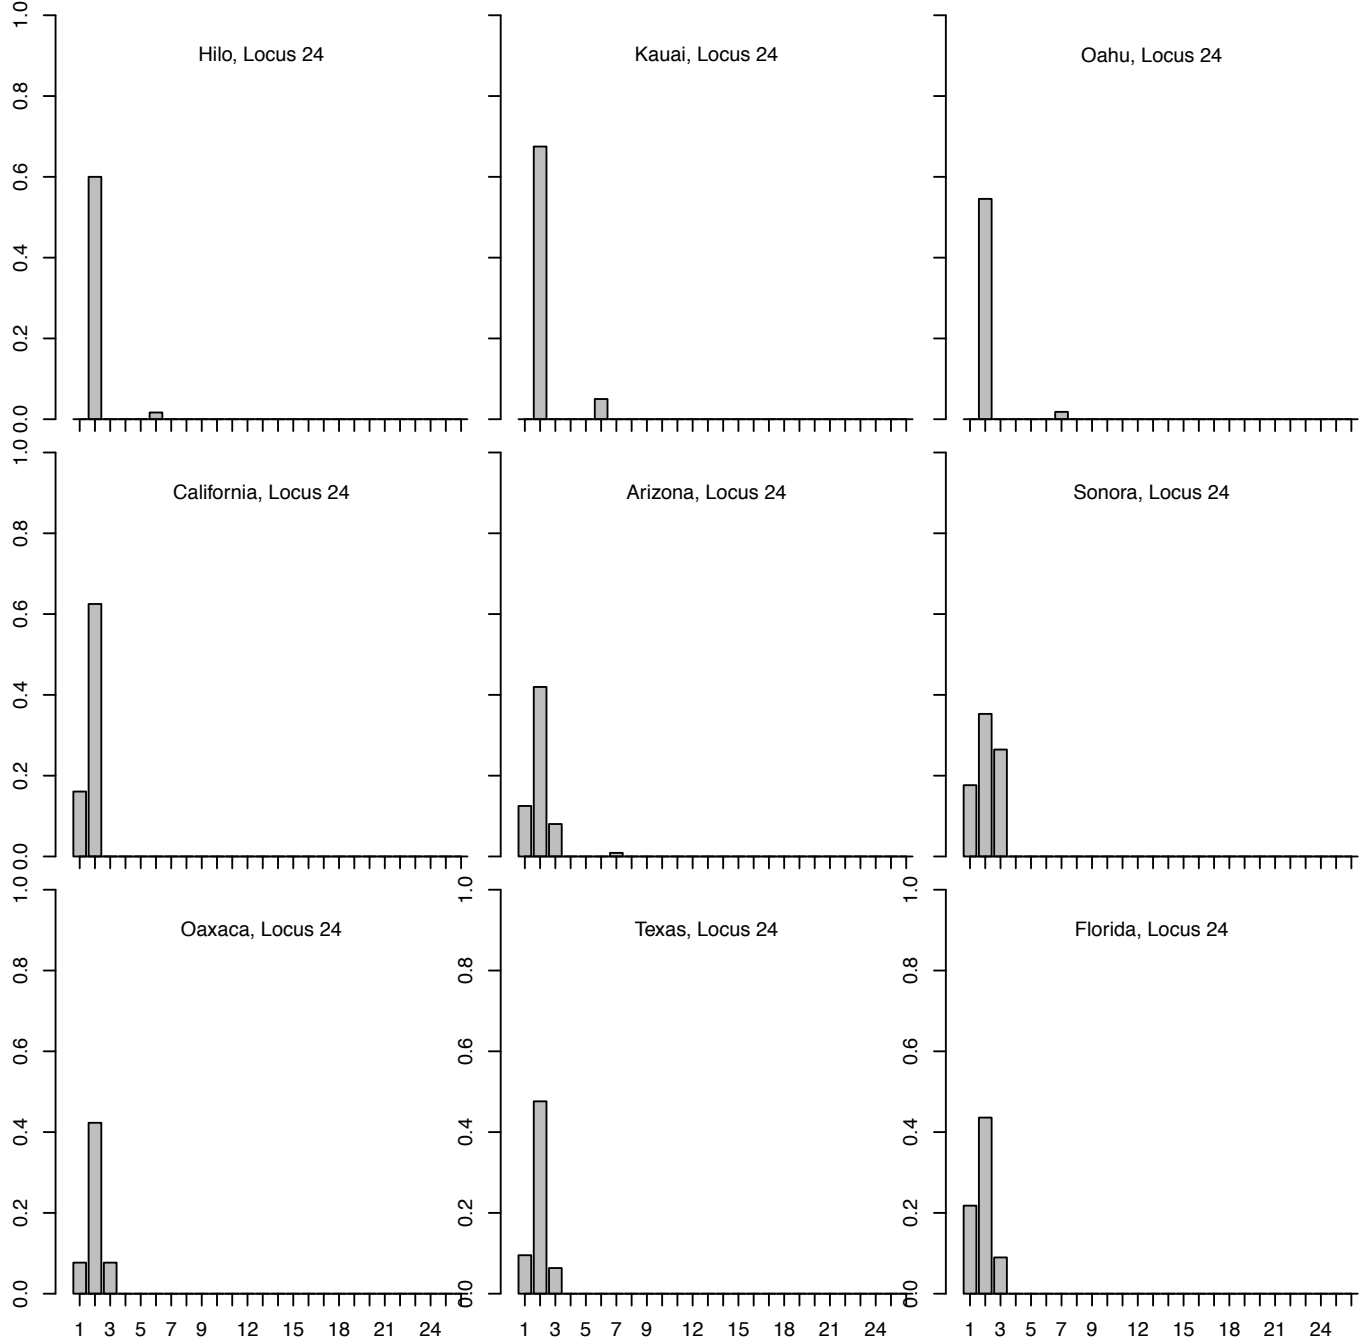

Supplemental Figure S8. Allele frequency histograms for msat locus 24 for each population.

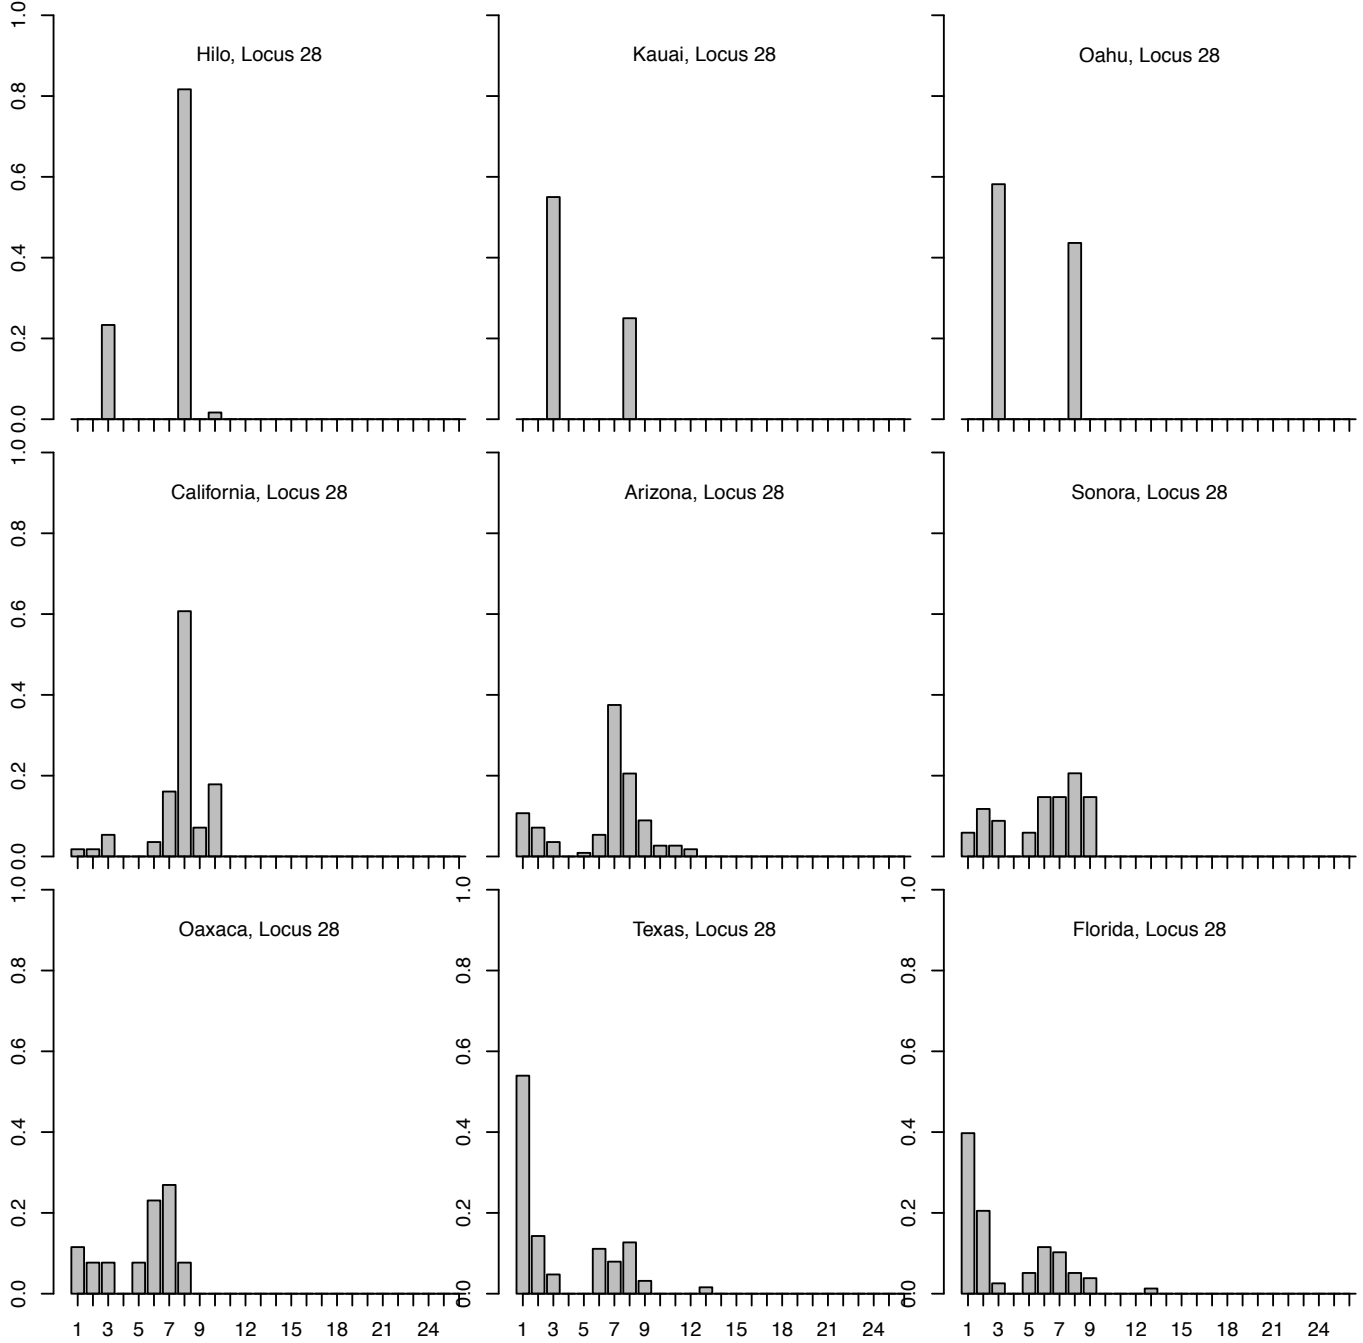

Supplemental Figure S9. Allele frequency histograms for msat locus 28 for each population.

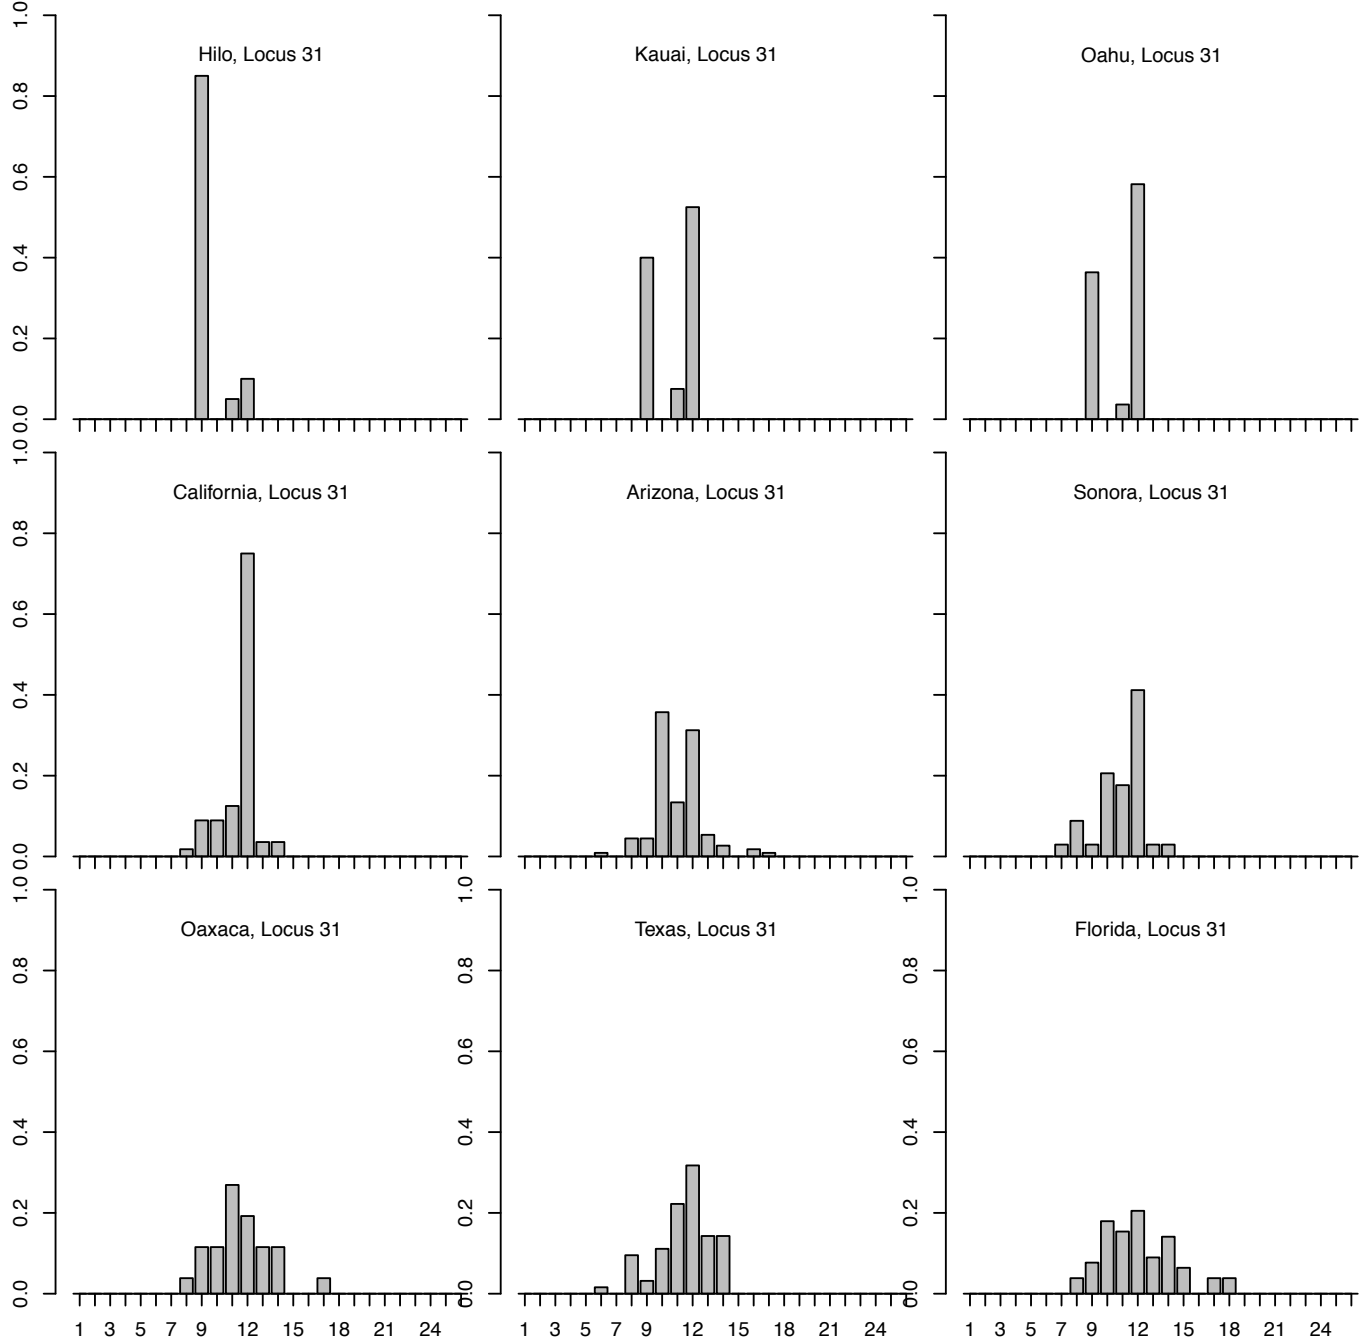

Supplemental Figure S10. Allele frequency histograms for msat locus 31 for each population.

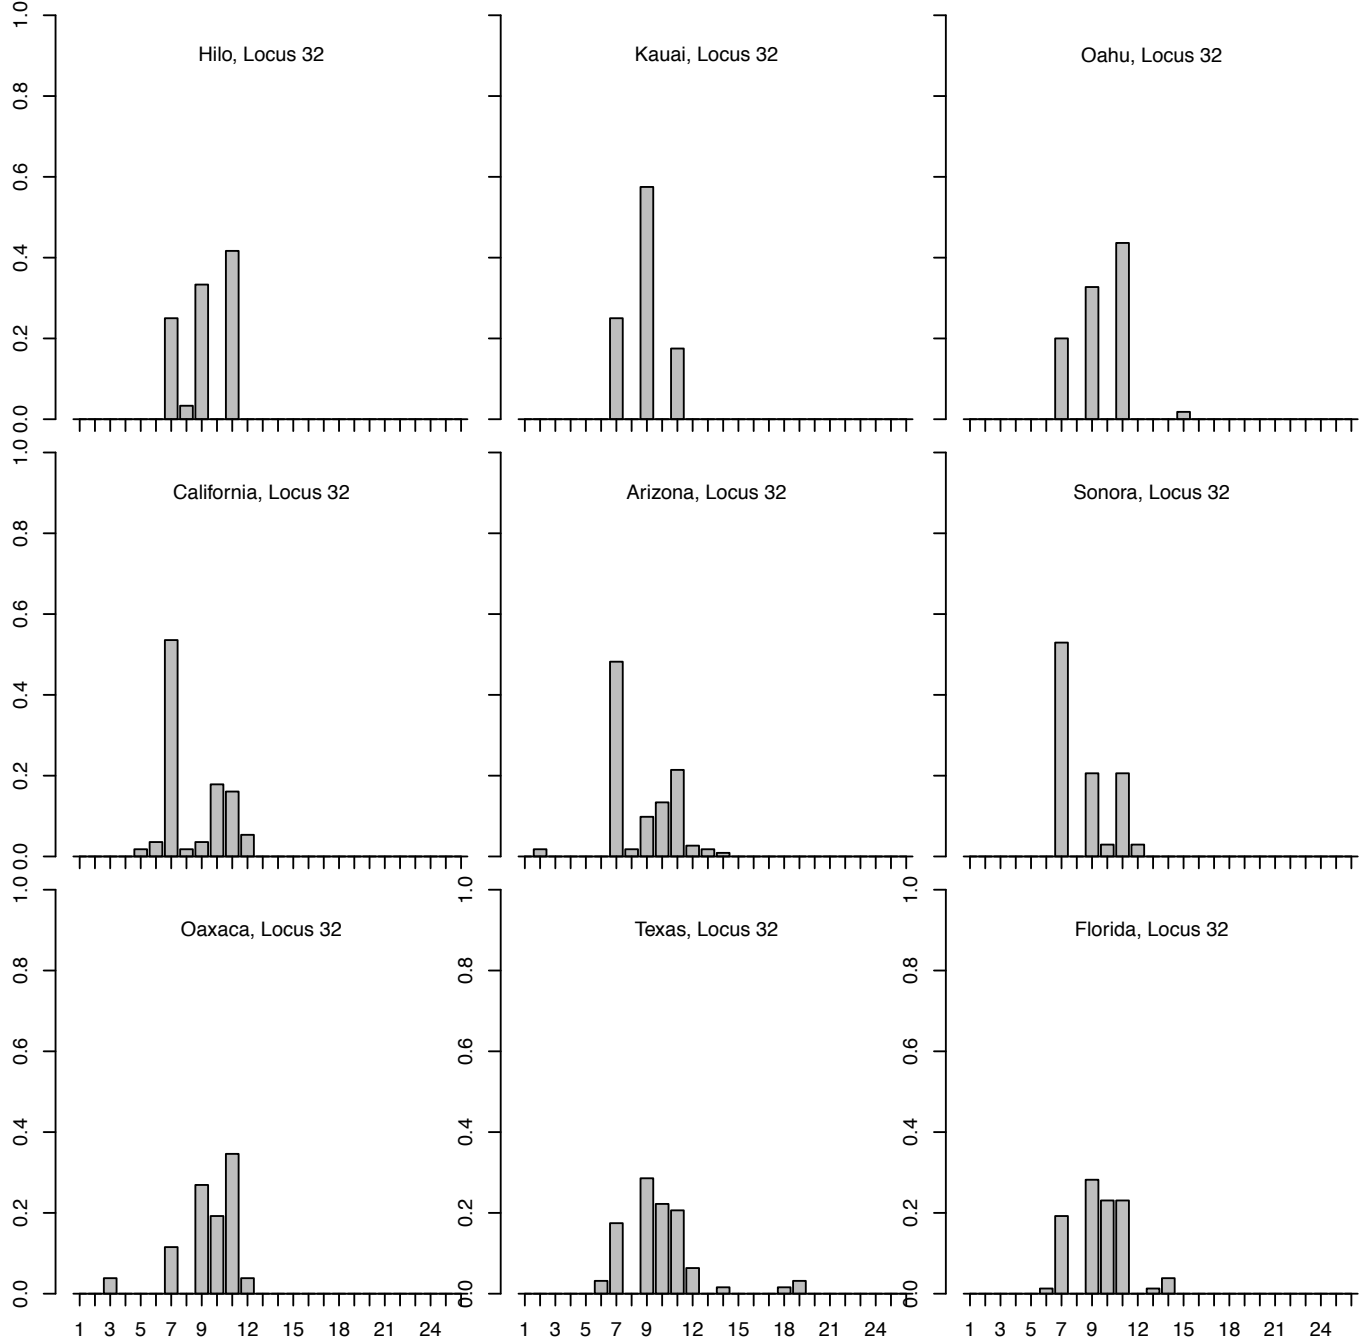

Supplemental Figure S11. Allele frequency histograms for msat locus 32 for each population.

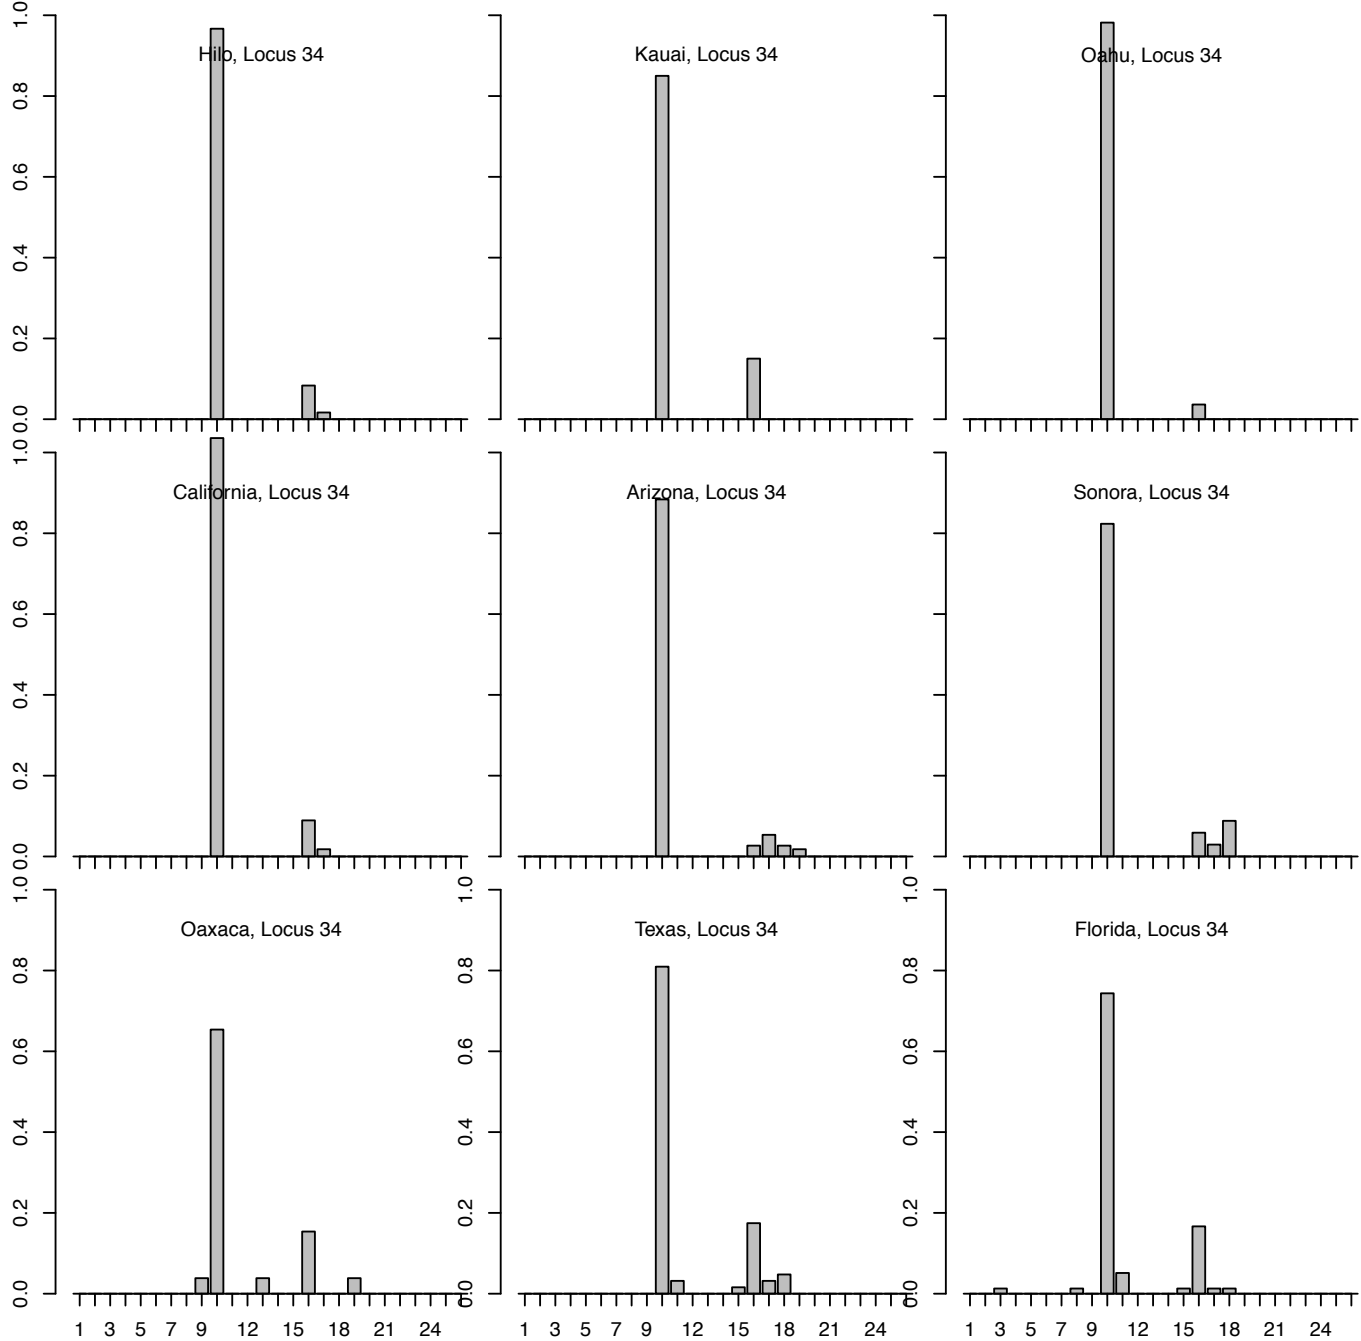

Supplemental Figure S12. Allele frequency histograms for msat locus 34 for each population.



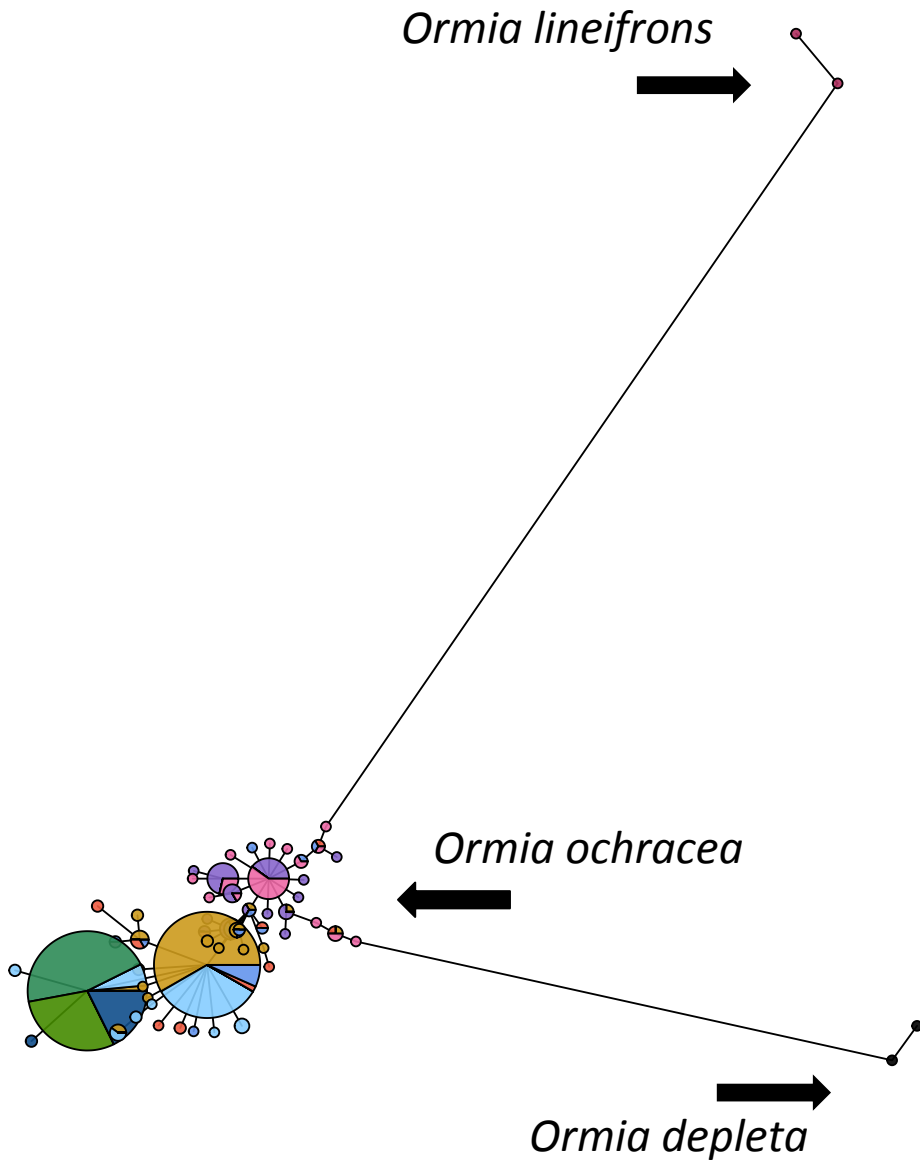

Supplemental Figure S13. *Ormia ochracea* haplotype network with outgroups *O. lineifrons* and *O. depleta* appended.
